# Supplementary material for: Interaction of storage carbohydrates and other cyclic fluxes with central metabolism: A quantitative approach by non-stationary 13C metabolic flux analysis
Source: PubMed Central journal article supplement — Metab Eng Commun. 2016 Jan 22;3:52–63. doi: 10.1016/j.meteno.2016.01.001 (PMC5779734; doi:10.1016/j.meteno.2016.01.001), 2016-01-22
Supplement: mmc1.pdf [file mmc1.pdf]

Interaction of storage carbohydrates and other cyclic fluxes with central metabolism: A quantitative approach by non-stationary <sup>13</sup>C metabolic flux analysis, **Supplementary Material #1**

**Table S1.1:** Reaction network including the atom transitions in the notation of Wiechert et al (2001).

| Flux                | Reaction |           |                  |
|---------------------|----------|-----------|------------------|
| <b>vFeedB</b>       | FeedB    | > Glc_ec  |                  |
|                     | #abcdef  | #abcdef   |                  |
| <b>uptGlc</b>       | Glc_ec   | > Glc6P   |                  |
|                     | #abcdef  | #abcdef   |                  |
| <b>leakGlc</b>      | Glc_ic   | > Glc_ec  |                  |
|                     | #abcdef  | #abcdef   |                  |
| <b>upt1</b>         | Glc_ic   | > Glc6P   |                  |
|                     | #abcdef  | #abcdef   |                  |
| <b>Tre1</b>         | Glc6P    | + UDPG    | > T6Pa + T6Pb    |
|                     | #abcdef  | #ABCDEF   | #abcdef #ABCDEF  |
| <b>Tre2</b>         | T6Pa     | <> Treh   |                  |
|                     | #abcdef  | #abcdef   |                  |
| <b>Tre2c</b>        | T6Pb     | <> Treh   |                  |
|                     | #abcdef  | #abcdef   |                  |
| <b>Tre3</b>         | Treh     | > Glc_ic  |                  |
|                     | #abcdef  | #abcdef   |                  |
| <b>Tre4</b>         | Treh_ec  | > Glc_ec  |                  |
|                     | #abcdef  | #abcdef   |                  |
| <b>Gly1</b>         | Glc6P    | <> GOneP  |                  |
|                     | #abcdef  | #abcdef   |                  |
| <b>Gly2</b>         | Glyco    | + Glyco   | > GOneP + Glc_ic |
|                     | #abcdef  | #ABCDEF   | #abcdef #ABCDEF  |
| <b>Gly3</b>         | GOneP    | > UDPG    |                  |
|                     | #abcdef  | #abcdef   |                  |
| <b>Gly4</b>         | UDPG     | > Glyco   |                  |
|                     | #abcdef  | #abcdef   |                  |
| <b>emp1</b>         | Glc6P    | <> Fru6P  |                  |
|                     | #abcdef  | #abcdef   |                  |
| <b>emp2</b>         | Fru6P    | <> FBP    |                  |
|                     | #abcdef  | #abcdef   |                  |
| <b>emp3</b>         | FBP      | <> DHAP   | + GA3P           |
|                     | #abcdef  | #cba      | #def             |
| <b>emp4</b>         | DHAP     | <> GA3P   |                  |
|                     | #abc     | #abc      |                  |
| <b>emp5</b>         | GA3P     | <> PG3    |                  |
|                     | #abc     | #abc      |                  |
| <b>emp6</b>         | PG3      | <> PG2    |                  |
|                     | #abc     | #abc      |                  |
| <b>emp7a</b>        | PG2      | <> PEP    |                  |
|                     | #abc     | #abc      |                  |
| <b>emp7b</b>        | PEP      | > PYR_cyt |                  |
|                     | #abc     | #abc      |                  |
| <b>pyr_t</b>        | PYR_cyt  | > PYR_mit |                  |
|                     | #abc     | #abc      |                  |
| <b>emp8</b>         | PYR_mit  | + CO2     | > OAA            |
|                     | #abc     | #d        | #abcd            |
| <b>emp9</b>         | PYR_cyt  | > Ald     | + CO2            |
|                     | #abc     | #ab       | #c               |
| <b>emp10</b>        | Ald      | > EtOH    |                  |
|                     | #ab      | #ab       |                  |
| <b>emp11</b>        | Ald      | > Acetate |                  |
|                     | #ab      | #ab       |                  |
| <b>emp12</b>        | Acetate  | > ACCOA   |                  |
|                     | #ab      | #ab       |                  |
| <b>emp13</b>        | Fru6P    | <> M6P    |                  |
|                     | #abcdef  | #abcdef   |                  |
| <b>emp14</b>        | DHAP     | <> G3P    |                  |
|                     | #abc     | #abc      |                  |
| <b>deg_prod_in</b>  | prod     | > ACCOA   |                  |
|                     | #AB      | #AB       |                  |
| <b>deg_prod_out</b> | ACCOA    | > prod    |                  |
|                     | #AB      | #AB       |                  |
| <b>aa_ala</b>       | PYR_cyt  | <> Ala    |                  |
|                     | #abc     | #abc      |                  |
| <b>ppp1</b>         | Glc6P    | > PG6     |                  |
|                     | #abcdef  | #abcdef   |                  |

| Flux                 | Reaction   |              |           |         |
|----------------------|------------|--------------|-----------|---------|
| <b>ppp2</b>          | Ru15P      | <> Xyl5P     |           |         |
|                      | #abcde     | #abcde       |           |         |
| <b>ppp3</b>          | Ru15P      | <> Rib5P     |           |         |
|                      | #abcde     | #abcde       |           |         |
| <b>ppp4</b>          | Xyl5P      | + Ery4P      | <> GA3P   | + Fru6P |
|                      | #ABCDE     | #abcd        | #CDE      | #ABabcd |
| <b>ppp5</b>          | Xyl5P      | + Rib5P      | <> Sed7P  | + GA3P  |
|                      | #ABCDE     | #abcde       | #Ababcde  | #CDE    |
| <b>ppp6</b>          | GA3P       | + Sed7P      | <> Ery4P  | + Fru6P |
|                      | #ABC       | #abcdefg     | #defg     | #abcABC |
| <b>ppp7</b>          | PG6        | > CO2        | + Ru15P   |         |
|                      | #abcdef    | #a           | #bcdef    |         |
| <b>mRNA_exchange</b> | Rib5P      | <> mRNA      |           |         |
|                      | #abcde     | #abcde       |           |         |
| <b>TCA1</b>          | PYR_mit    | > ACCOA      | + CO2     |         |
|                      | #ABC       | > #BC        | #A        |         |
| <b>TCA2</b>          | ACCOA      | + OAA        | > CIT_mit |         |
|                      | #AB        | #abcd        | #dcbaBA   |         |
| <b>TCA3</b>          | CIT_mit    | <> isoCIT    |           |         |
|                      | #ABCDEF    | > #ABCDEF    |           |         |
| <b>TCA4</b>          | isoCIT     | > AKG        | + CO2     |         |
|                      | #ABCDEF    | > #ABCEF     | #D        |         |
| <b>TCA5</b>          | AKG        | > SUCC       | + CO2     |         |
|                      | #ABCDE     | #BCDE        | #A        |         |
| <b>TCA5B</b>         | AKG        | > SUCC       | + CO2     |         |
|                      | #ABCDE     | #EDCB        | #A        |         |
| <b>TCA6</b>          | SUCC       | <> FUM       |           |         |
|                      | #ABCD      | #ABCD        |           |         |
| <b>TCA6B</b>         | SUCC       | <> FUM       |           |         |
|                      | #ABCD      | #DCBA        |           |         |
| <b>TCA7</b>          | FUM        | <> MAL       |           |         |
|                      | #ABCD      | #ABCD        |           |         |
| <b>TCA8</b>          | MAL        | <> OAA       |           |         |
|                      | #ABCD      | #ABCD        |           |         |
| <b>aa_glu</b>        | AKG        | <> Glu       |           |         |
|                      | #ABCDE     | > #ABCDE     |           |         |
| <b>aa_asp</b>        | OAA        | <> Asp       |           |         |
|                      | #ABCD      | #ABCD        |           |         |
| <b>GLOX1</b>         | isoCIT     | > gliox      | + SUCC    |         |
|                      | #ABCDEF    | > #AB        | #DCEF     |         |
| <b>GLOX2</b>         | ACCOA      | + gliox      | > MAL     |         |
|                      | #AB        | #ab          | #ABab     |         |
| <b>Treh_trans</b>    | Treh       | <> Treh_ec   |           |         |
|                      | #abcdef    | #abcdef      |           |         |
| <b>EtOH_trans</b>    | EtOH       | <> EtOH_ec   |           |         |
|                      | #ab        | #ab          |           |         |
| <b>Acetate_trans</b> | Acetate    | > Acetate_ec |           |         |
|                      | #ab        | #ab          |           |         |
| <b>v_wo_Glc</b>      | Glc_ec     | > Glc_wo     |           |         |
|                      | #abcdef    | #abcdef      |           |         |
| <b>v_wo_EtOH</b>     | EtOH_ec    | > EtOH_wo    |           |         |
|                      | #ab        | #ab          |           |         |
| <b>v_wo_Acetate</b>  | Acetate_ec | > Acetate_wo |           |         |
|                      | #ab        | #ab          |           |         |
| <b>v_wo_Treh</b>     | Treh_ec    | > Treh_wo    |           |         |
|                      | #abcdef    | #abcdef      |           |         |
| <b>CO2out1</b>       | CO2        | > CO2_ec     |           |         |
|                      | #a         | #a           |           |         |
| <b>BIO_G6P</b>       | Glc6P      | > Glc6P_bm   |           |         |
|                      | #ABCDEF    | #ABCDEF      |           |         |
| <b>BIO_F6P</b>       | Fru6P      | > Fru6P_bm   |           |         |
|                      | #ABCDEF    | #ABCDEF      |           |         |
| <b>BIO_AcCoA</b>     | ACCOA      | > ACCOA_bm   |           |         |
|                      | #BC        | #BC          |           |         |
| <b>BIO_OAA</b>       | OAA        | > OAA_bm     |           |         |
|                      | #ABCD      | #ABCD        |           |         |
| <b>BIO_E4P</b>       | Ery4P      | > Ery4P_bm   |           |         |
|                      | #ABCD      | #ABCD        |           |         |
| <b>BIO_R5P</b>       | Rib5P      | > Rib5P_bm   |           |         |
|                      | #ABCDE     | #ABCDE       |           |         |

Interaction of storage carbohydrates and other cyclic fluxes with central metabolism: A quantitative approach by non-stationary <sup>13</sup>C metabolic flux analysis, **Supplementary Material #1**

| Flux            | Reaction |            | Flux                 | Reaction |               |        |       |
|-----------------|----------|------------|----------------------|----------|---------------|--------|-------|
| <b>BIO_G3P</b>  | G3P      | > G3P_bm   |                      | #abcdef  | #abcdef       |        |       |
|                 | #ABCD    | #ABCD      | <b>BIO_Asp</b>       | Asp      | > Asp_BM      |        |       |
| <b>BIO_Glu</b>  | Glu      | > Glu_bm   |                      | #abcd    | #abcd         |        |       |
|                 | #ABCDE   | #ABCDE     | <b>BIO_Ala</b>       | Ala      | > Ala_BM      |        |       |
| <b>BIO_Pyr</b>  | PYR_mit  | > PYR_bm   |                      | #abc     | #abc          |        |       |
|                 | #ABC     | #ABC       | <b>BIO_Val</b>       | Val      | > Val_BM      |        |       |
| <b>BIO_PG3</b>  | PG3      | > PG3_bm   |                      | #abcde   | #abcd         |        |       |
|                 | #abc     | #abc       | <b>FA_metabolism</b> | G3P      | <> Fatty_Acid |        |       |
| <b>BIO_PEP</b>  | PEP      | > PEP_bm   |                      | #abc     | #abc          |        |       |
|                 | #abc     | #abc       | <b>aa_val</b>        | PYR_mit  | + PYR_mit     | > Val  | + CO2 |
| <b>BIO_Tre</b>  | Treh     | > Treh_bm  |                      | #abc     | #ABC          | #abcBC | #A    |
|                 | #abcdef  | #abcdef    |                      |          |               |        |       |
| <b>BIO_Glyc</b> | Glyco    | > Glyco_bm |                      |          |               |        |       |

**Table S1.2:** Precursor requirements for biomass formation ( $\mu\text{mol}/\text{g}_{\text{DW}}$ ) were calculated based on the biomass composition reported in Lange and Heijnen (2001). Unfortunately there are no measurements available for  $D = 0.3 \text{ h}^{-1}$ , we assumed that the biomass composition is comparable to  $D = 0.211 \text{ h}^{-1}$ . Positive coefficients indicate production of the respective metabolite.

| Precursor Metabolite | Dilution rate (D) |        |        |
|----------------------|-------------------|--------|--------|
|                      | 0.052             | 0.107  | 0.211  |
| Alanine              | -422              | -446   | -480   |
| Glutamate            | -805              | -850   | -915   |
| Aspartate            | -826              | -873   | -939   |
| Valine               | -241              | -255   | -274   |
| Pyruvate             | -643              | -680   | -732   |
| PG3                  | -716              | -780   | -833   |
| R5P                  | -792              | -889   | -941   |
| AcCoA                | -2616             | -2158  | -2361  |
| PEP                  | -271              | -286   | -308   |
| E4P                  | -142              | -150   | -161   |
| OAA                  | -76               | -109   | -109   |
| G3P                  | -92               | -72    | -79    |
| G6P                  | -1037             | -872   | -1216  |
| F6P                  | -519              | -436   | -608   |
| CO <sub>2</sub>      | 864               | 936    | 1001   |
| NADH                 | 1240              | 1338   | 1432   |
| NADPH                | -10548            | -10098 | -10914 |
