# Supplementary material for: Interaction of storage carbohydrates and other cyclic fluxes with central metabolism: A quantitative approach by non-stationary 13C metabolic flux analysis
Source: PubMed Central journal article supplement — Metab Eng Commun. 2016 Jan 22;3:52–63. doi: 10.1016/j.meteno.2016.01.001 (PMC5779734; doi:10.1016/j.meteno.2016.01.001), 2016-01-22
Supplement: mmc3.pdf [file mmc3.pdf]

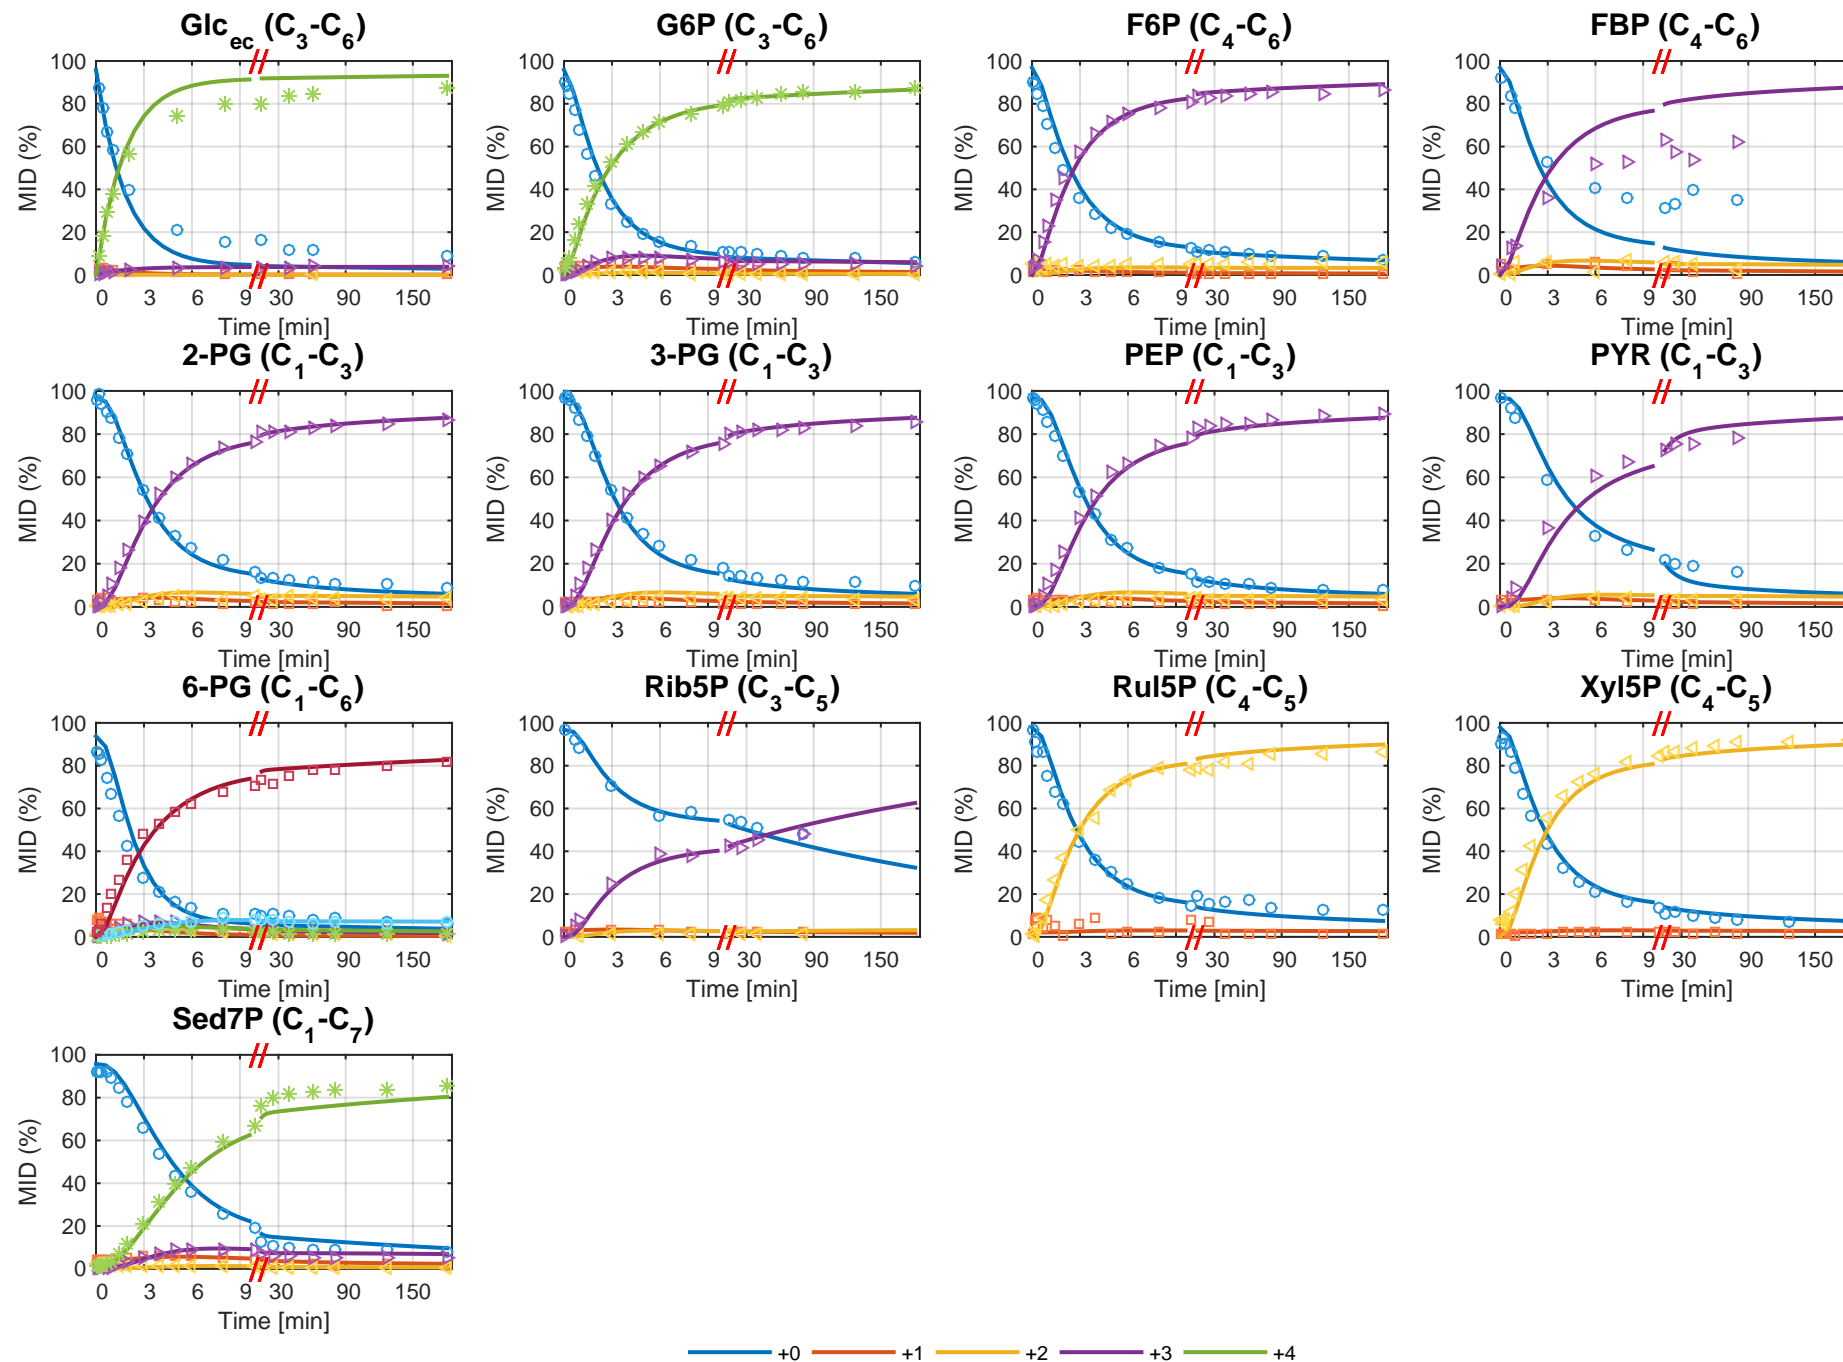

Figure S3-1a. Dynamics of mass isotopomers. Metabolites of the Glycolysis and PPP  $D = 0.054$  1/h

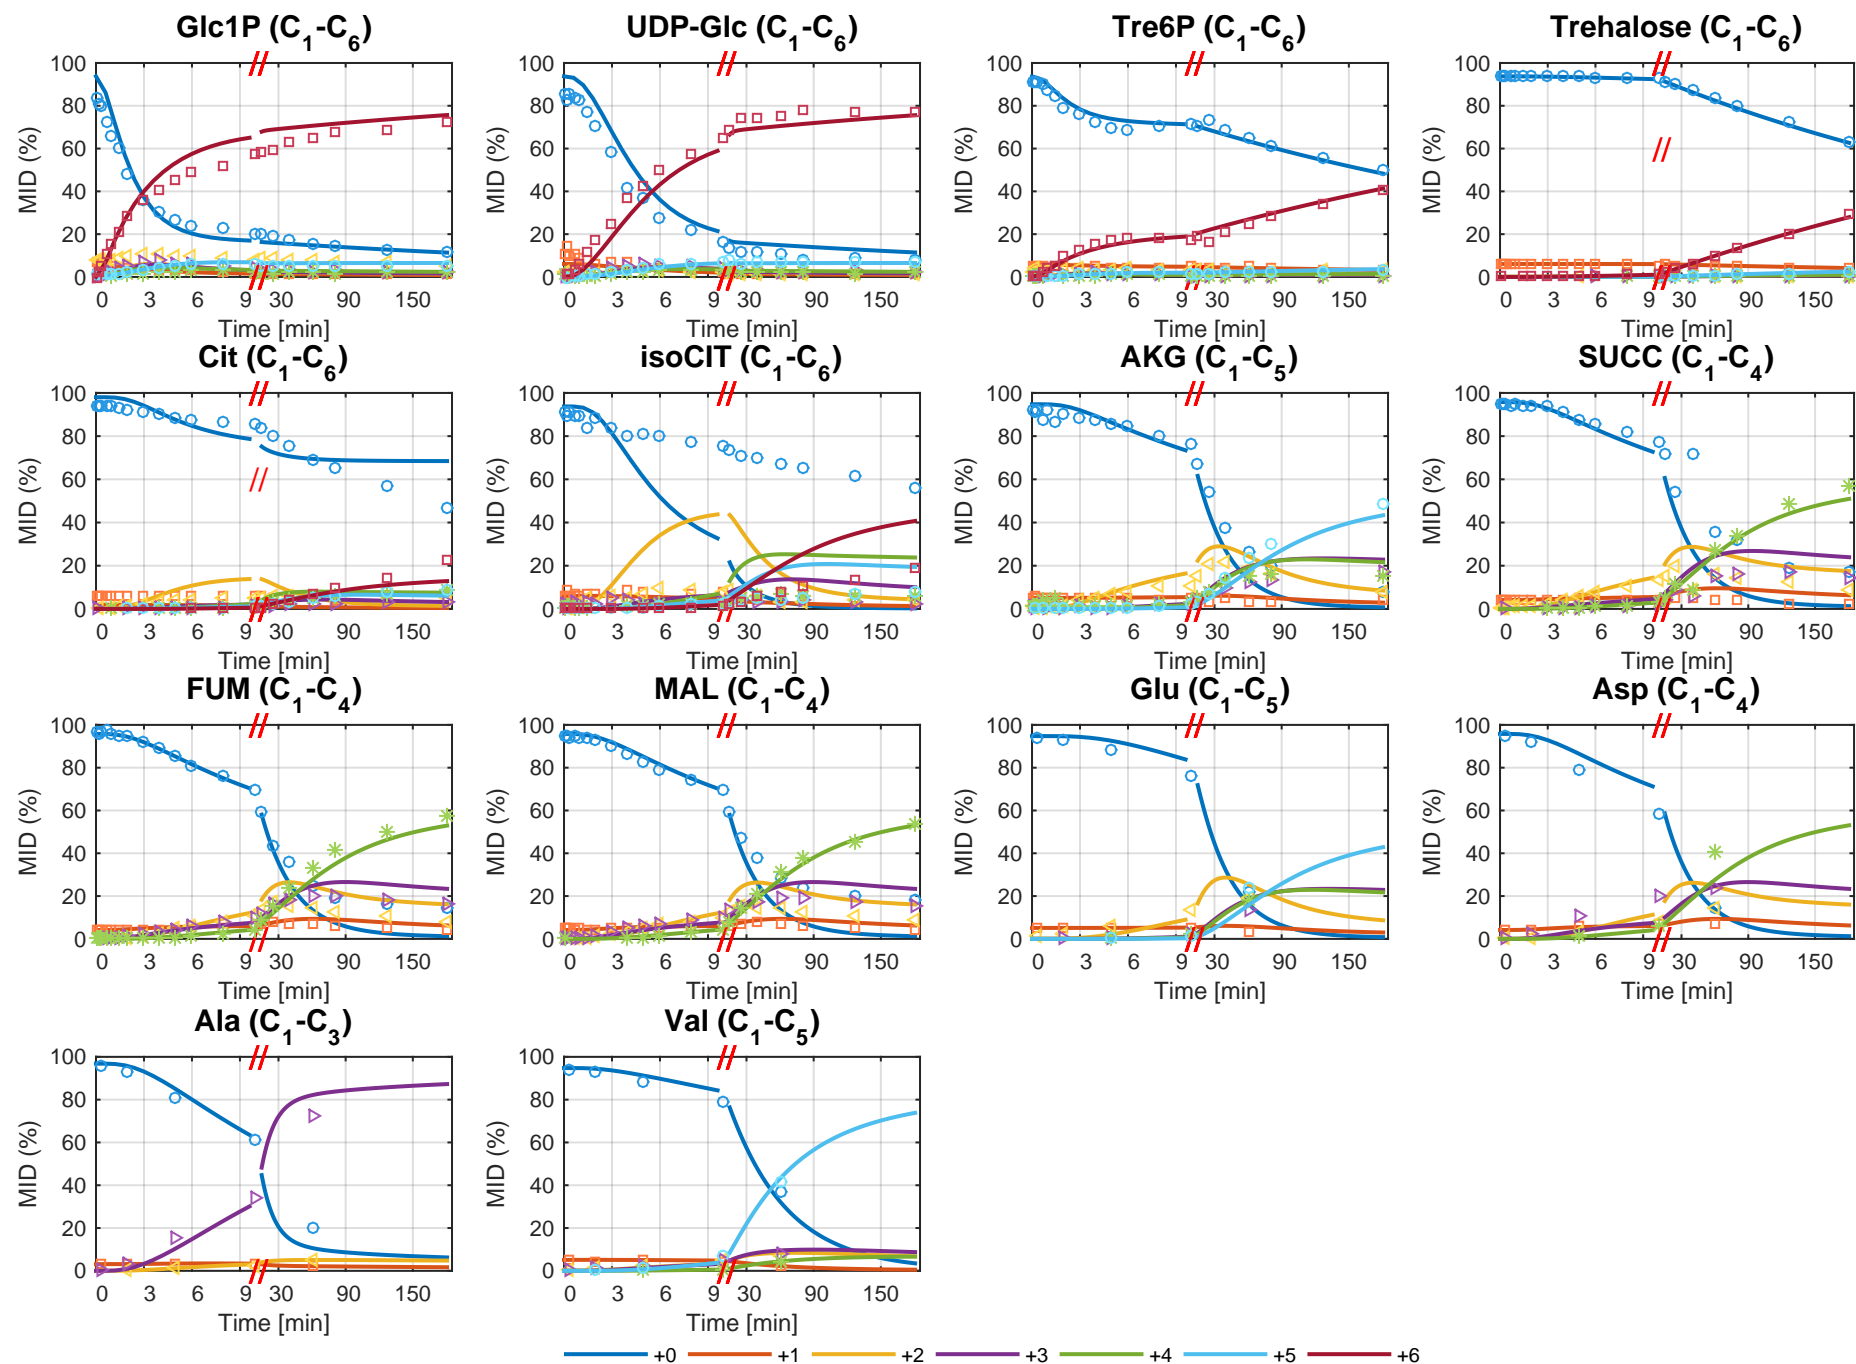

Figure S3-1b. Dynamics of mass isotopomers. Metabolites of the storage carbohydrates, TCA cycle and amino acids  $D = 0.054$  1/h

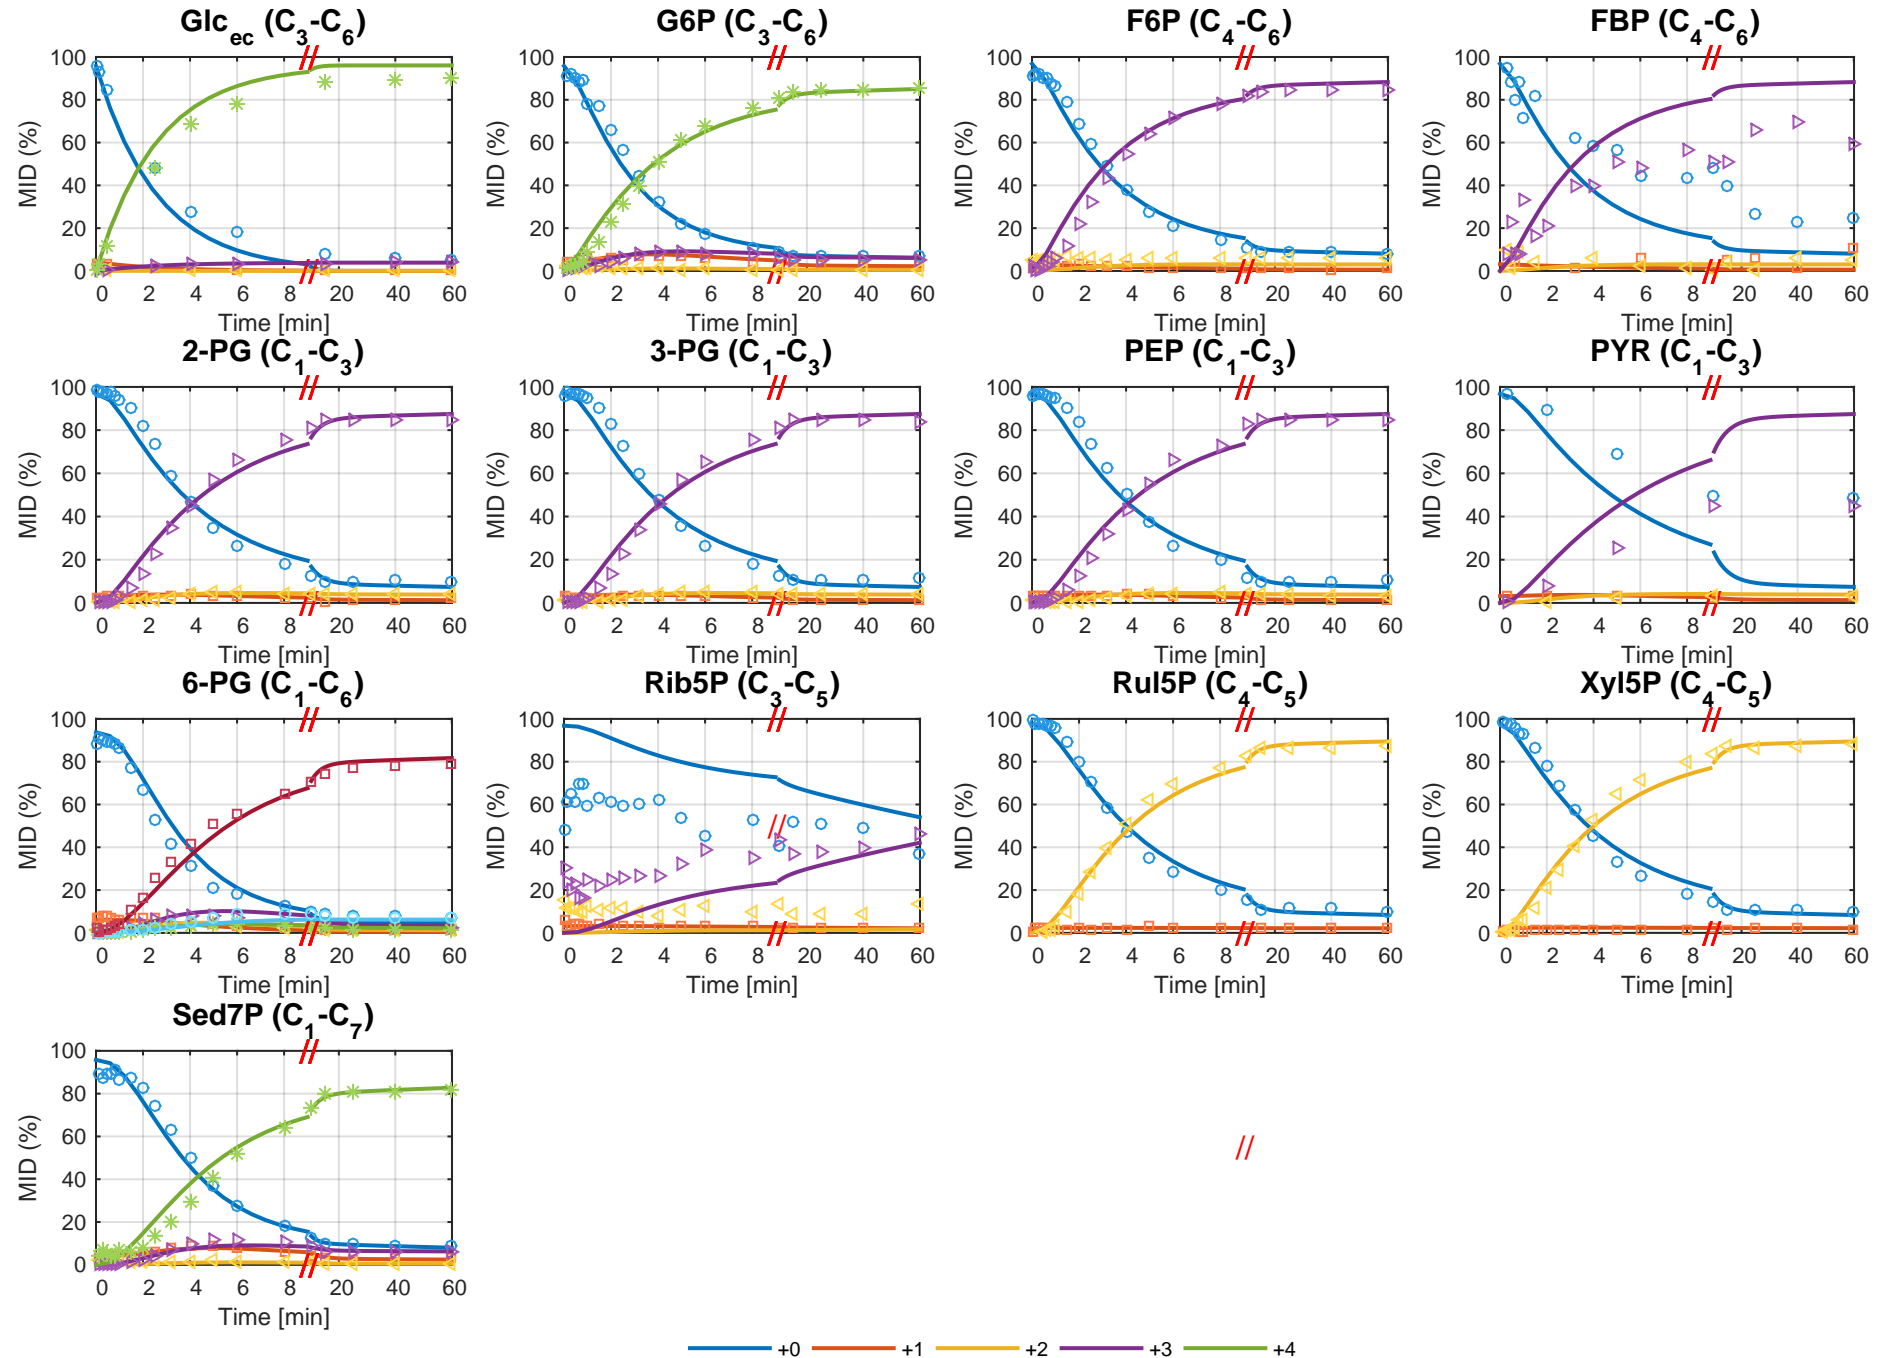

Figure S3-2a. Dynamics of mass isotopomers. Metabolites of the Glycolysis and PPP  $D = 0.101$  1/h

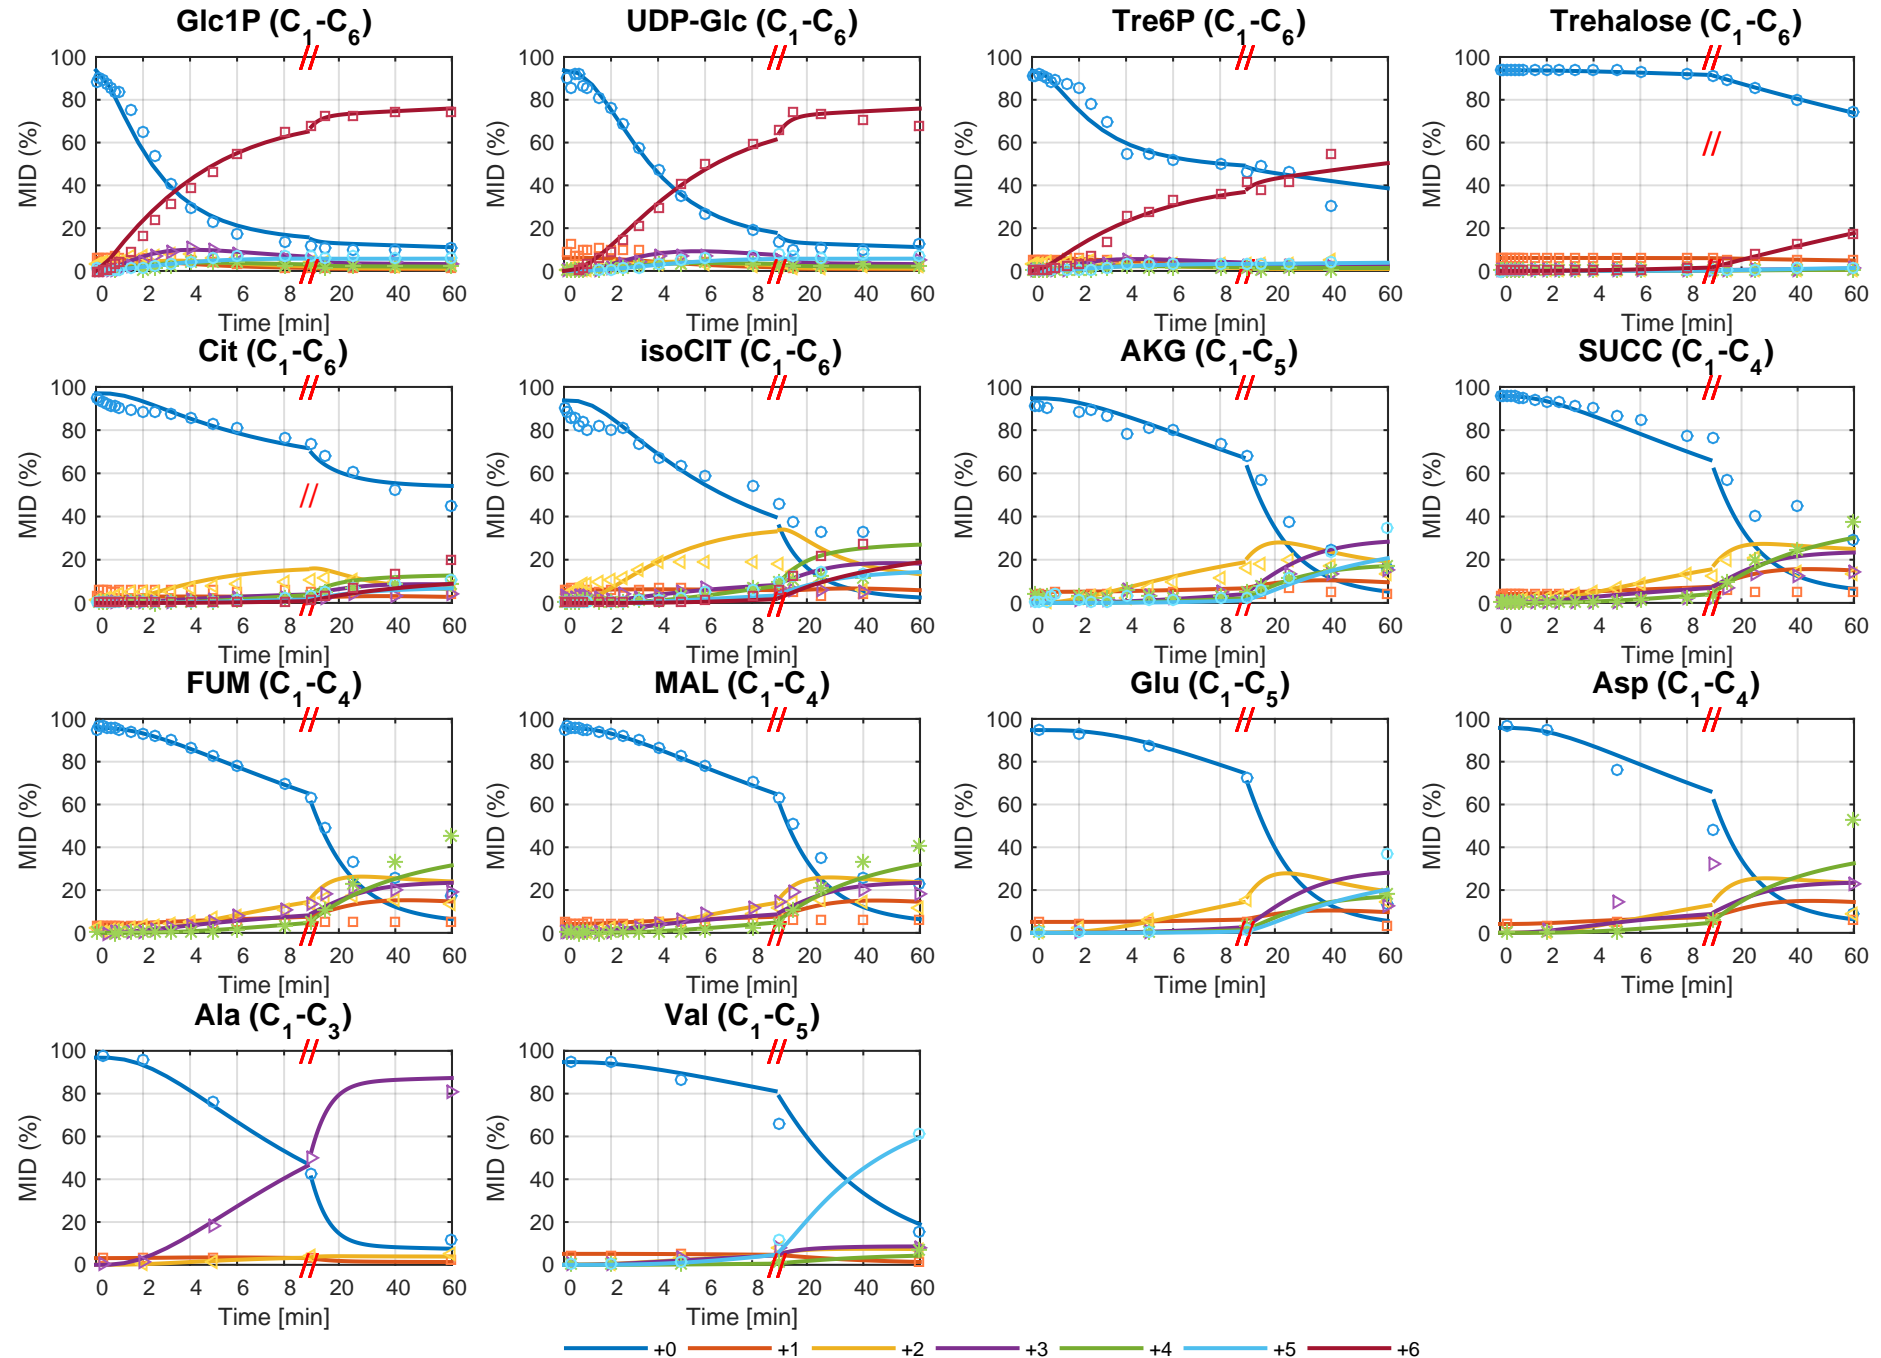

Figure S3-2b. Dynamics of mass isotopomers. Metabolites of the storage carbohydrates, TCA cycle and amino acids  $D = 0.101$  1/h

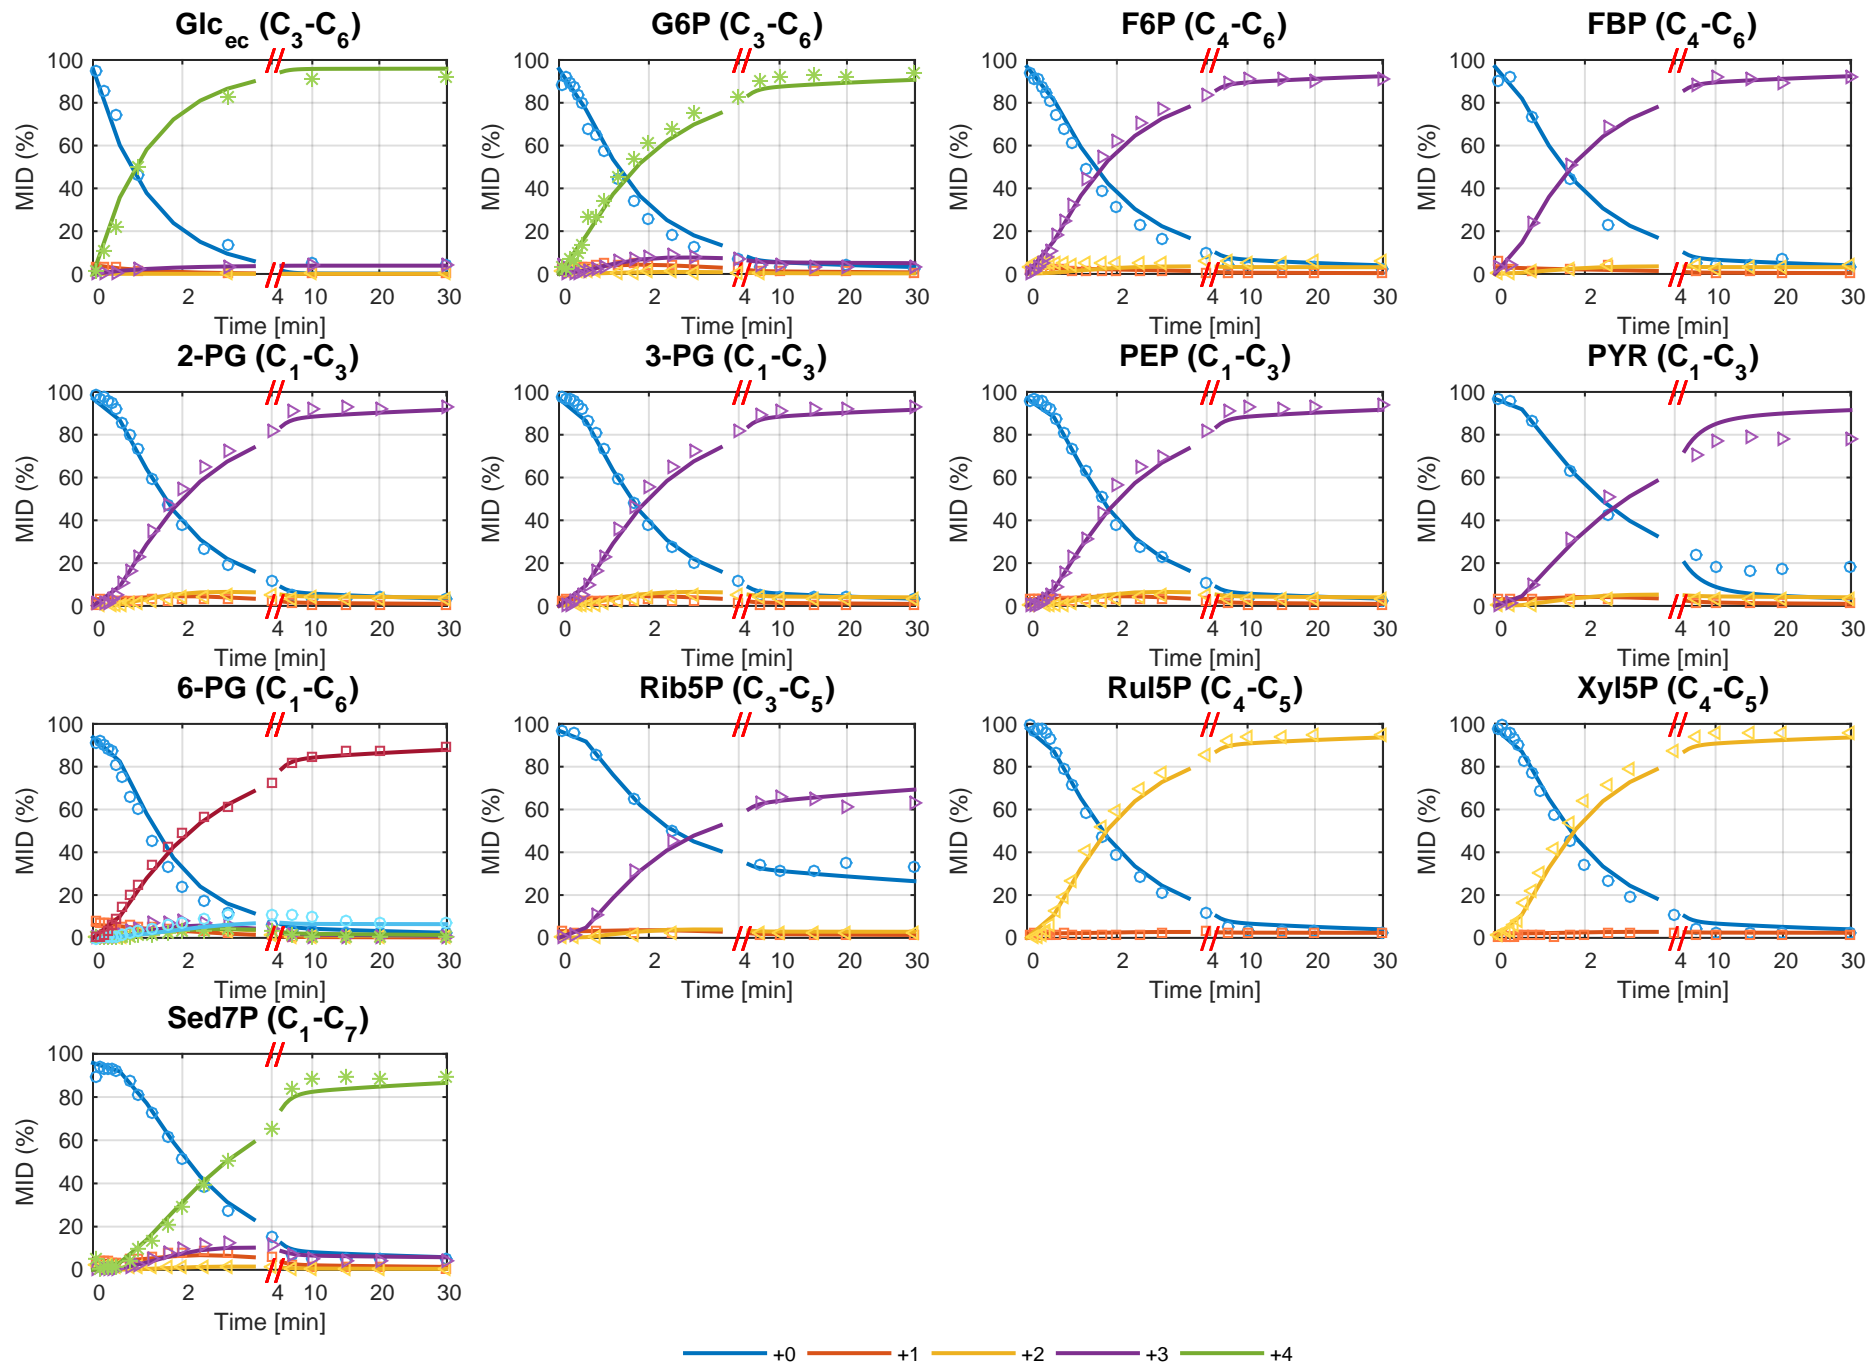

Figure S3-3a. Dynamics of mass isotopomers. Metabolites of the Glycolysis and PPP  $D = 0.207$  1/h

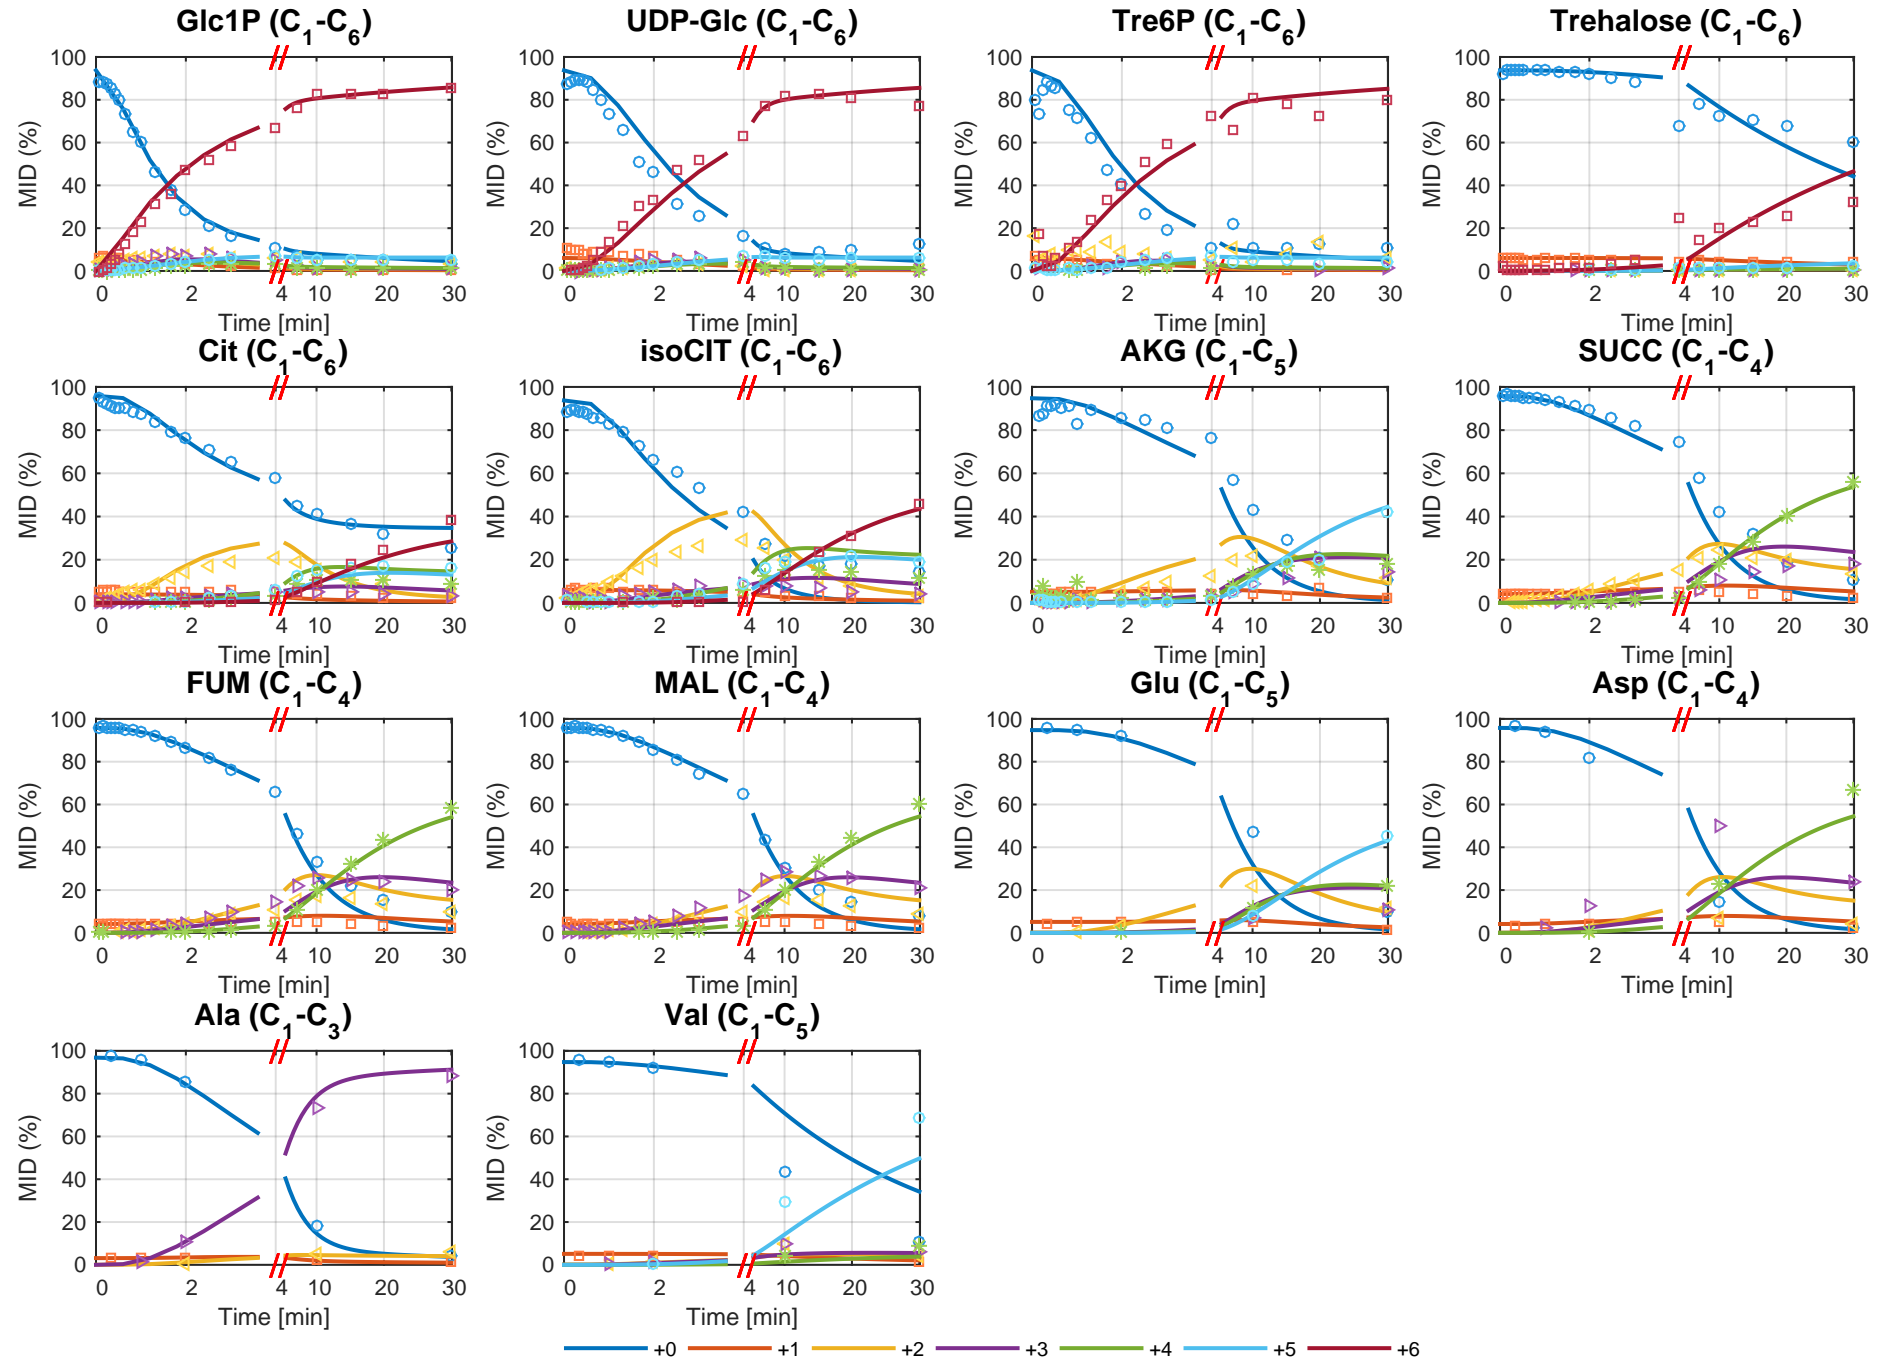

Figure S3-3b. Dynamics of mass isotopomers. Metabolites of the storage carbohydrates, TCA cycle and amino acids  $D = 0.207$  1/h

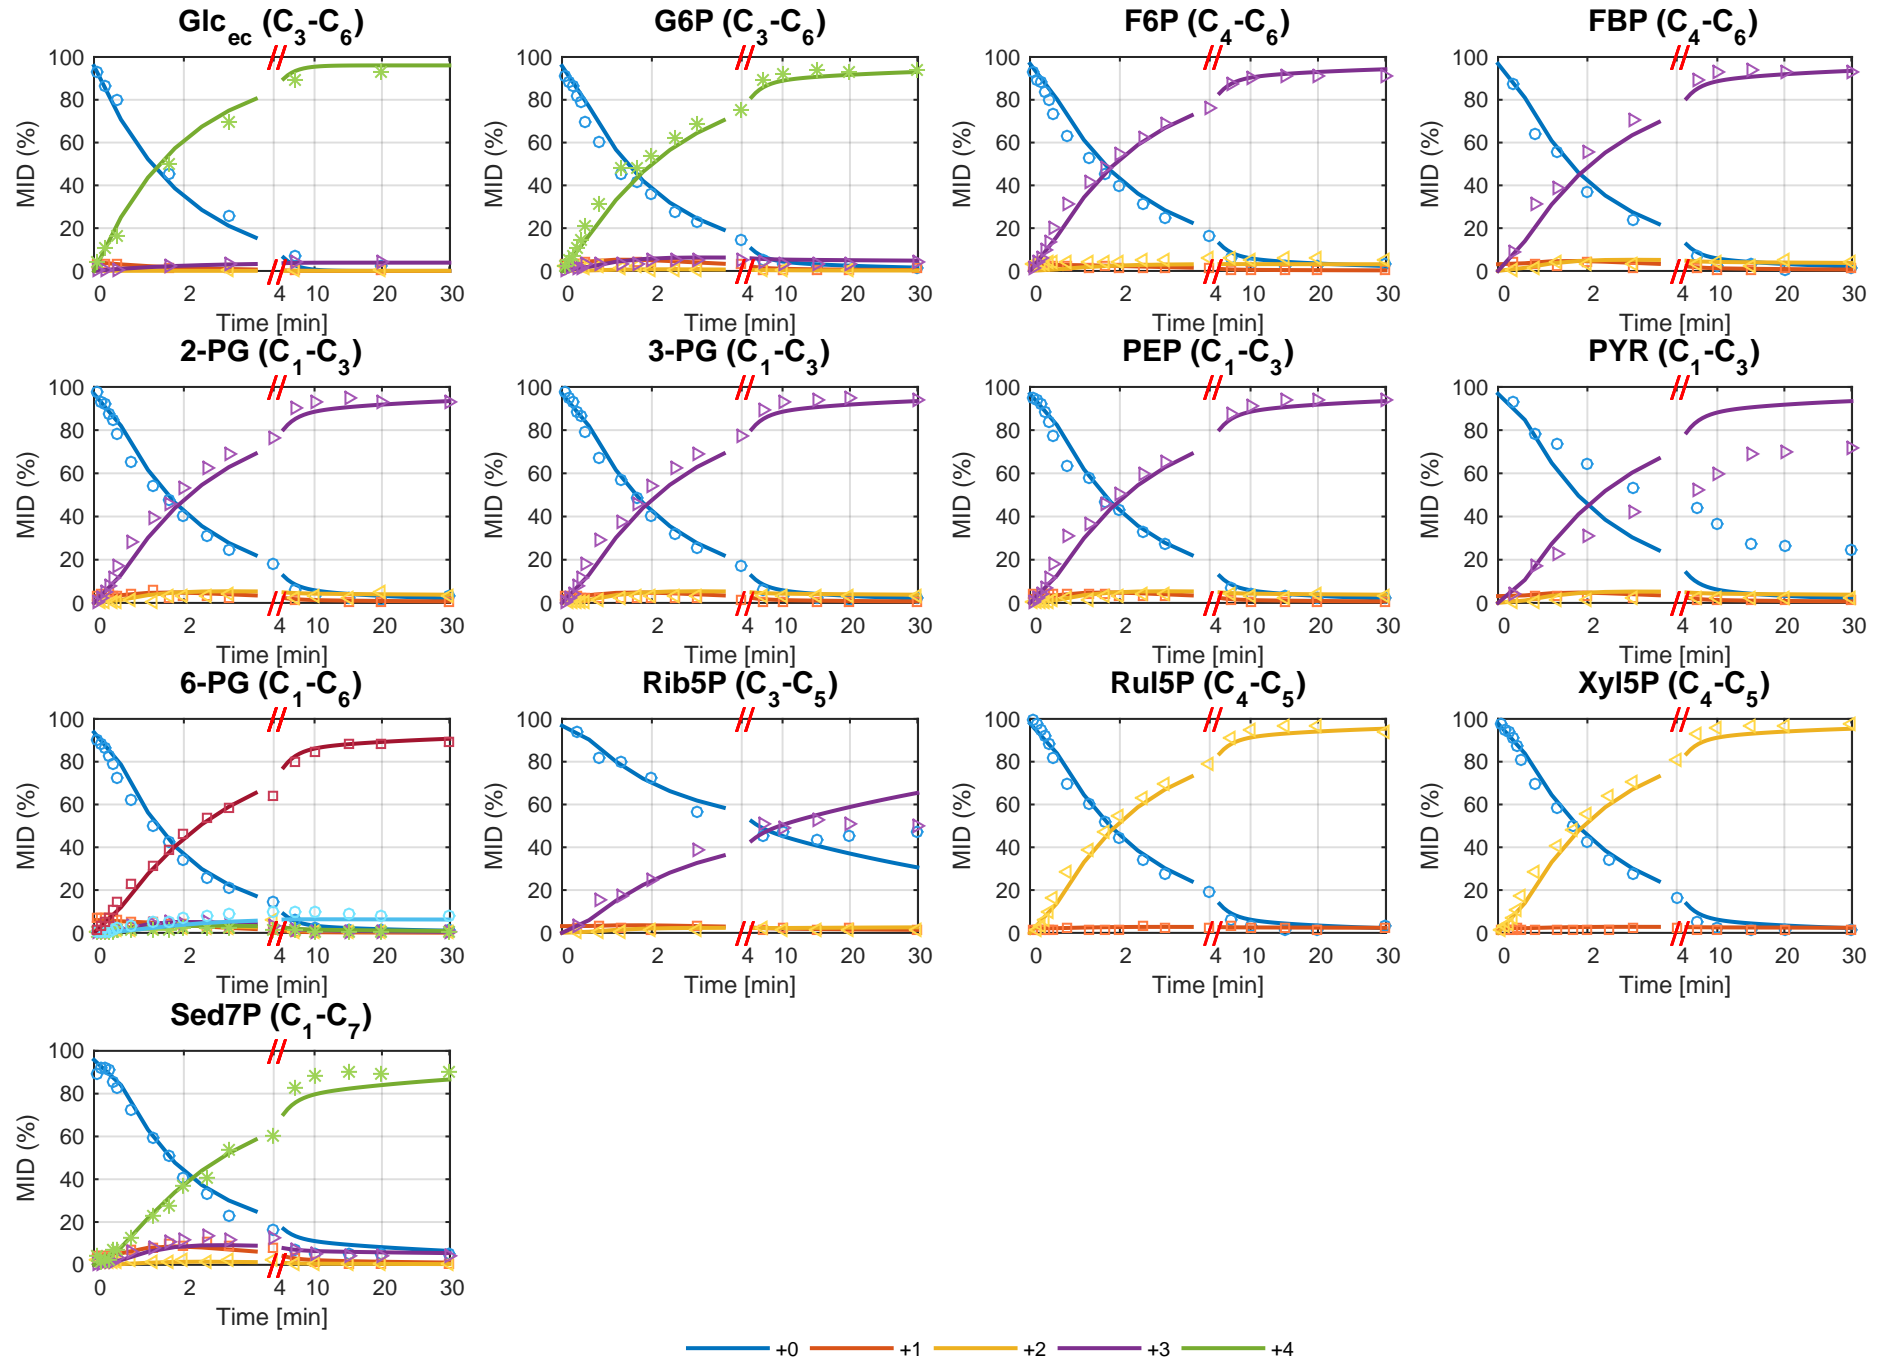

Figure S3-4a. Dynamics of mass isotopomers. Metabolites of the Glycolysis and PPP  $D = 0.307$  1/h

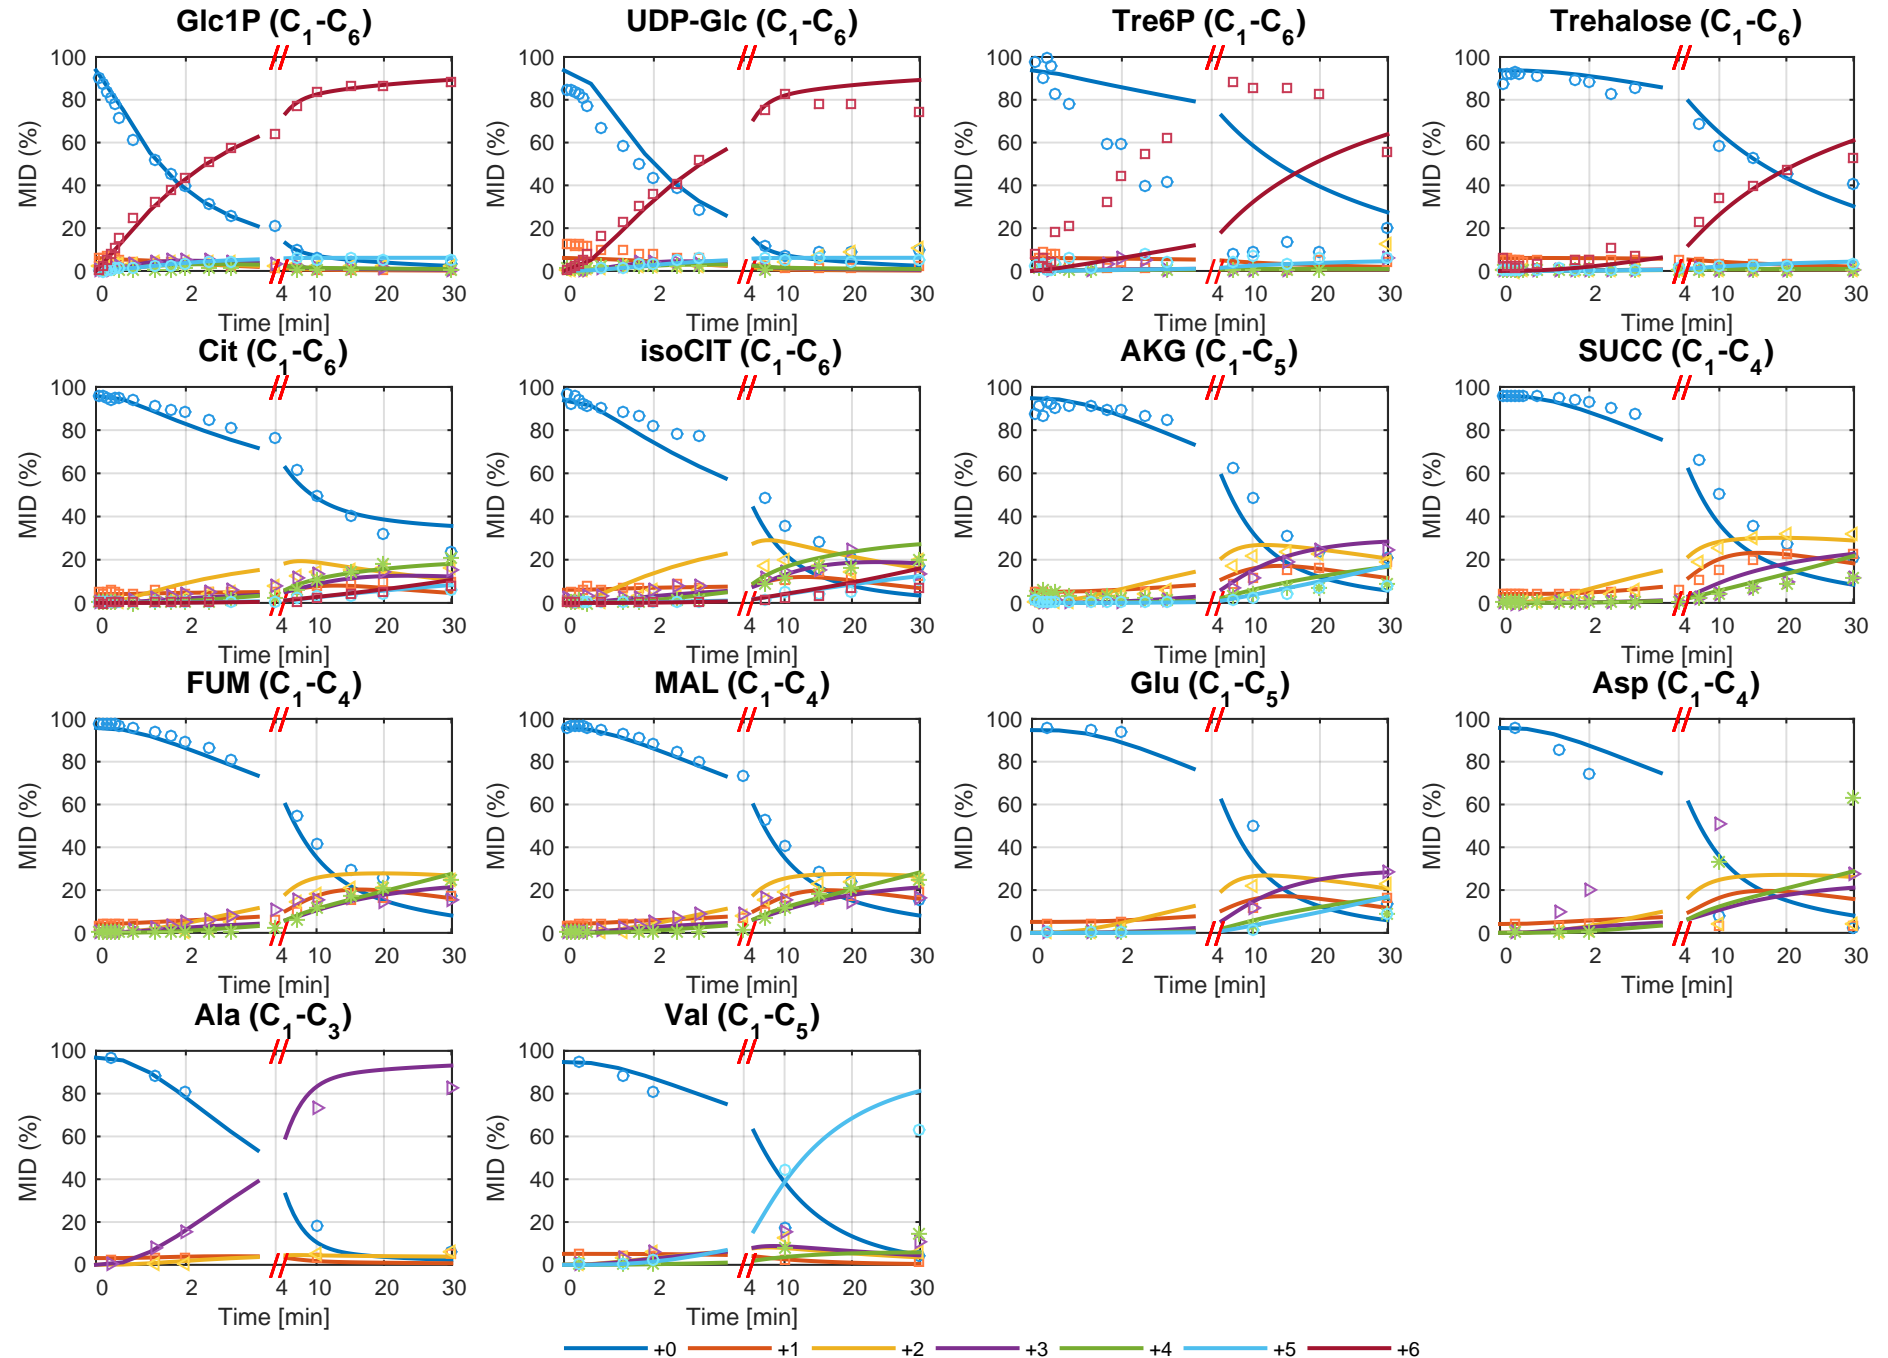

Figure S3-4b. Dynamics of mass isotopomers. Metabolites of the storage carbohydrates, TCA cycle and amino acids  $D = 0.307$  1/h
