# Supplementary material for: Interaction of storage carbohydrates and other cyclic fluxes with central metabolism: A quantitative approach by non-stationary 13C metabolic flux analysis
Source: PubMed Central journal article supplement — Metab Eng Commun. 2016 Jan 22;3:52–63. doi: 10.1016/j.meteno.2016.01.001 (PMC5779734; doi:10.1016/j.meteno.2016.01.001), 2016-01-22
Supplement: mmc5.pdf [file mmc5.pdf]

Interaction of storage carbohydrates and other cyclic fluxes with central metabolism: A quantitative approach by non-stationary  $^{13}\text{C}$  metabolic flux analysis.

### Supplementary Material #5: Flux maps & tables

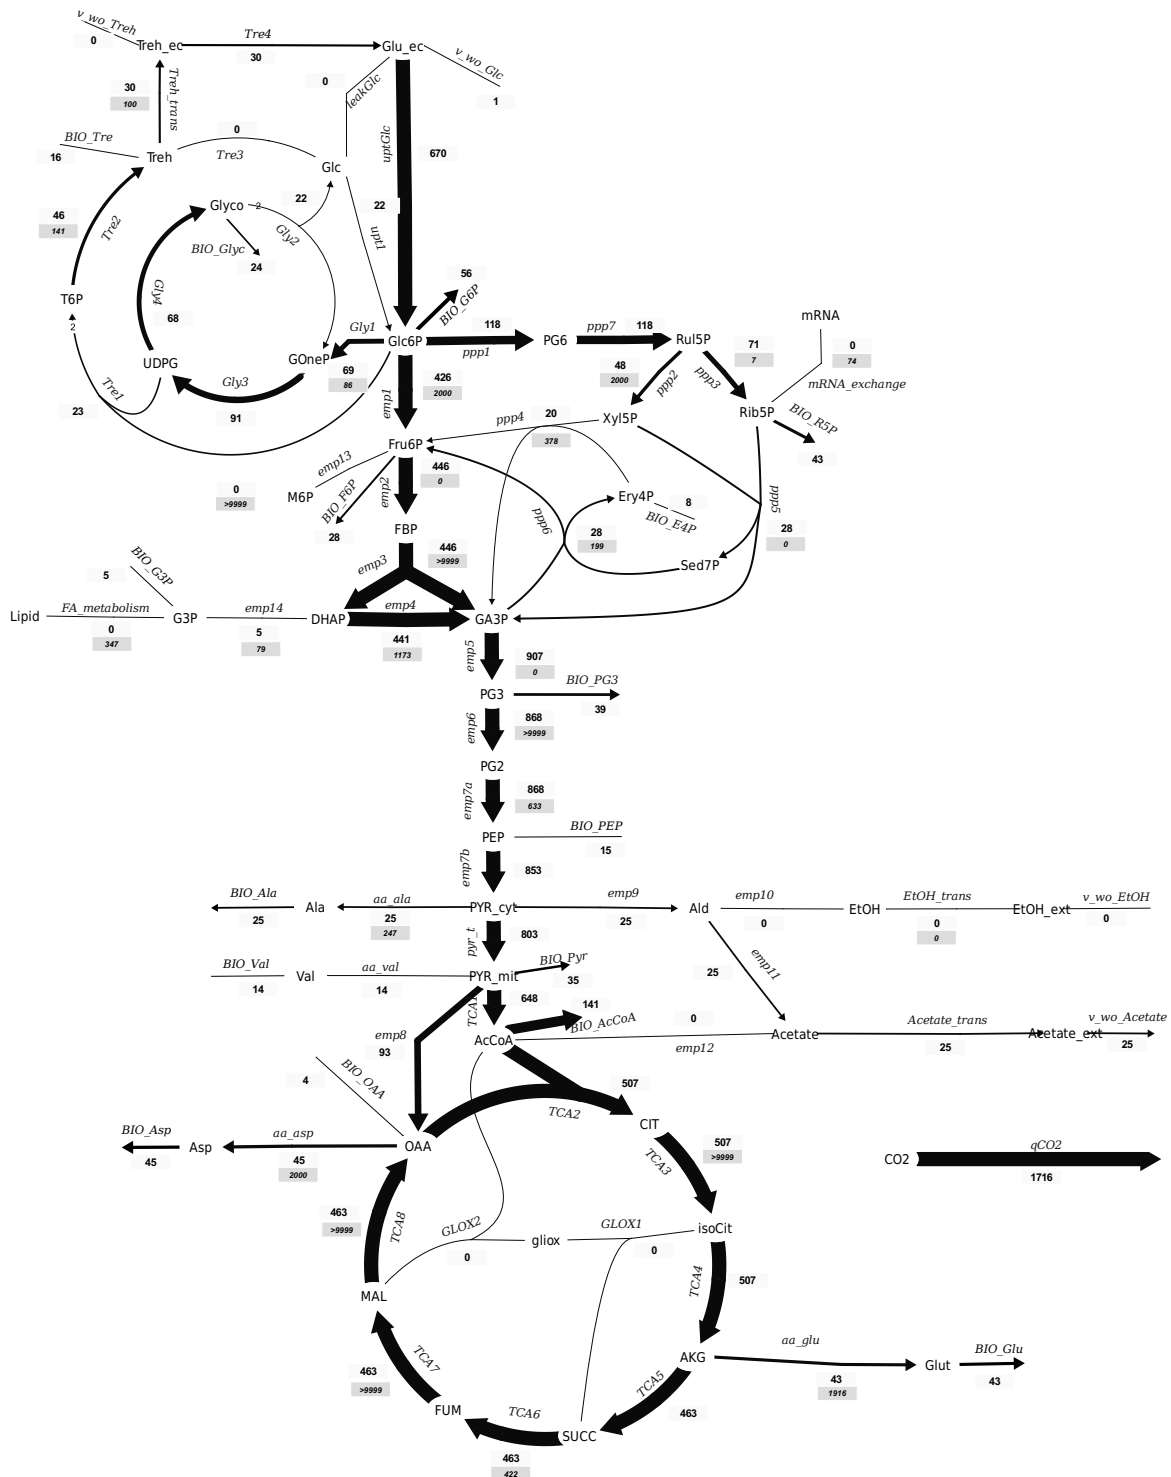

**Figure S5-1:** Flux distribution at the dilution rate  $D=0.054 \text{ h}^{-1}$ . Flux values are given in  $10^{-6} \text{ mol g}_{\text{DW}}^{-1} \text{ h}^{-1}$ , see Table S5-1 for standard deviations. The reaction arrow thickness (in pixel) scales linear with the flux (flux value / 10) with a maximal thickness of 20 pixel and a minimum value of 1.

Interaction of storage carbohydrates and other cyclic fluxes with central metabolism: A quantitative approach by non-stationary <sup>13</sup>C metabolic flux analysis.

### Supplementary Material #5: Flux maps & tables

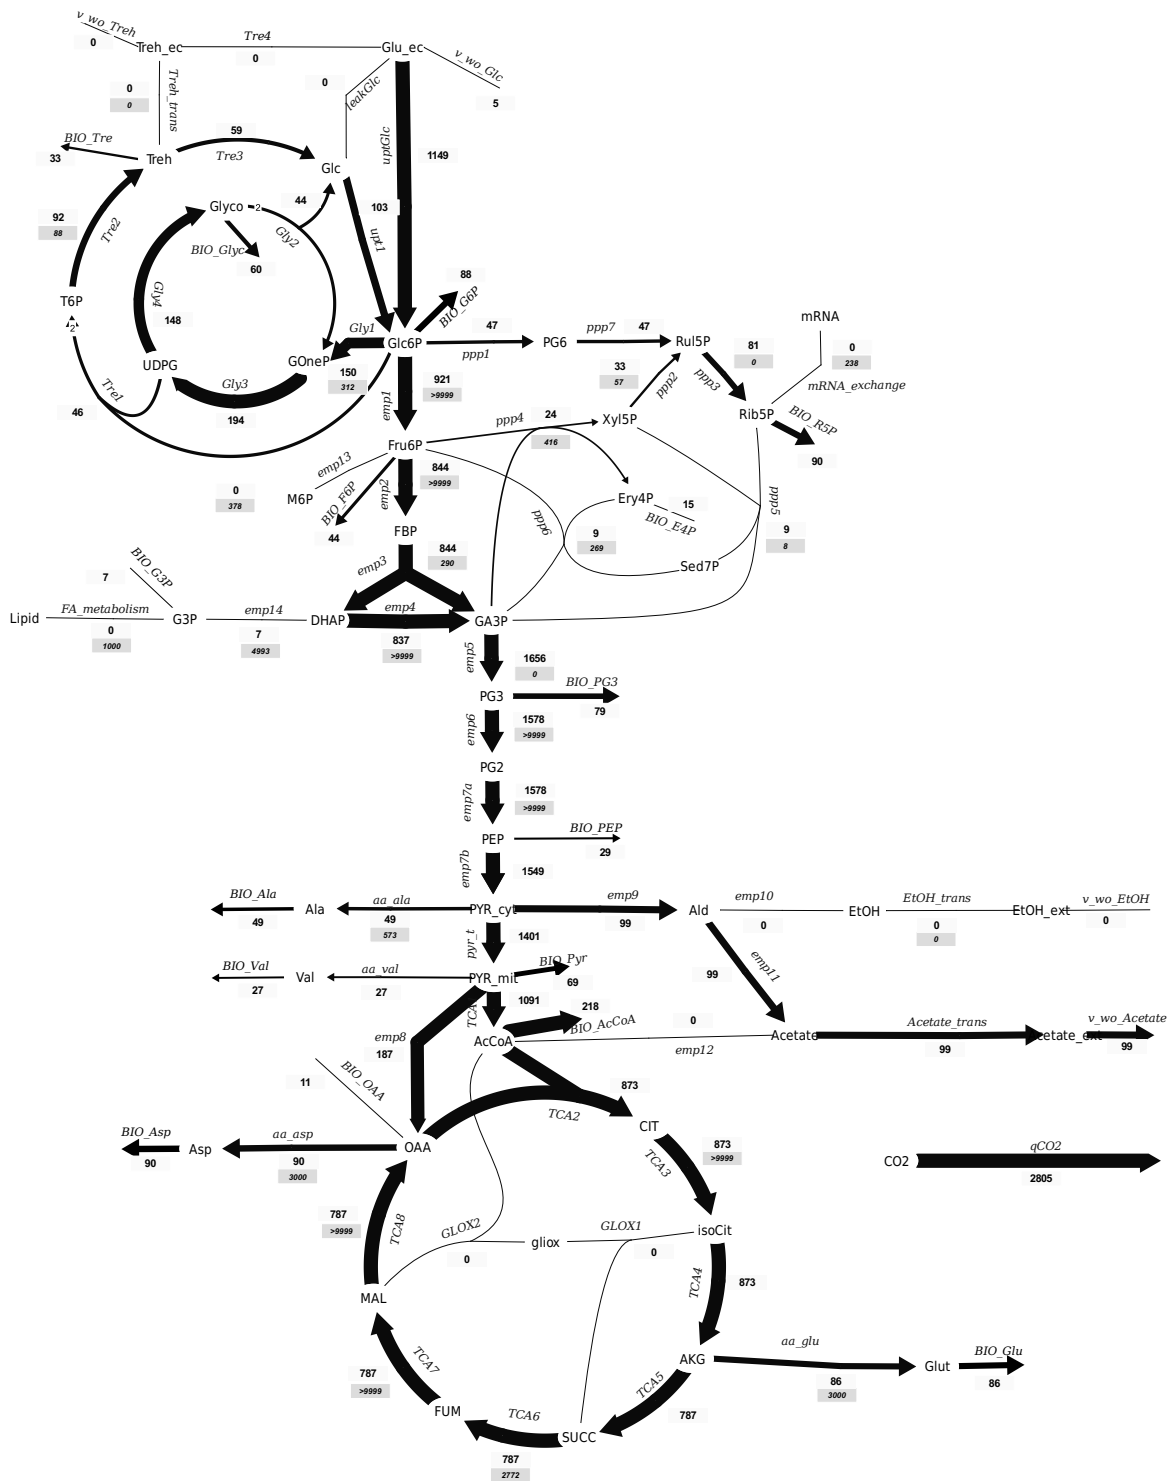

**Figure S5-2:** Flux distribution at the dilution rate  $D=0.101 \text{ h}^{-1}$ . Flux values are given in  $10^{-6} \text{ mol g}_{\text{DW}}^{-1} \text{ h}^{-1}$ , see Table S5-1 for standard deviations. The reaction arrow thickness (in pixel) scales linear with the flux (flux value / 10) with a maximal thickness of 20 pixel and a minimum value of 1.

Interaction of storage carbohydrates and other cyclic fluxes with central metabolism: A quantitative approach by non-stationary  $^{13}\text{C}$  metabolic flux analysis.

### Supplementary Material #5: Flux maps & tables

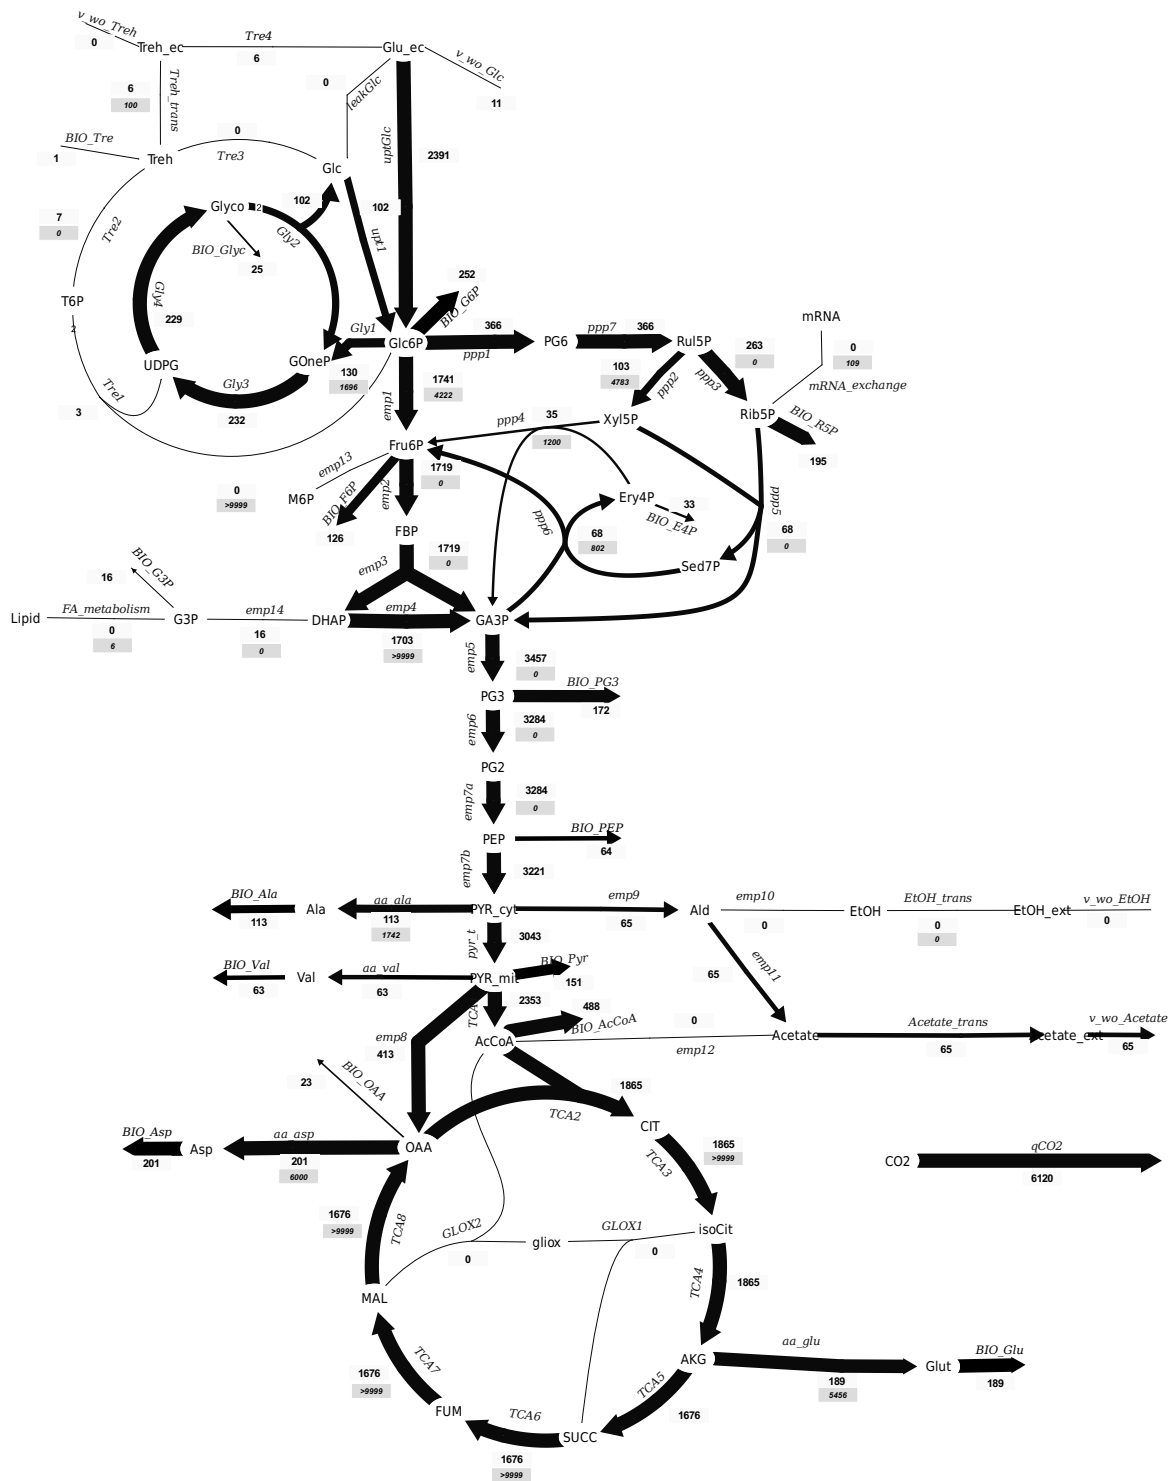

**Figure S5-3:** Flux distribution at the dilution rate  $D=0.207 \text{ h}^{-1}$ . Flux values are given in  $10^{-6} \text{ mol g}_{\text{DW}}^{-1} \text{ h}^{-1}$ , see Table S5-1 for standard deviations. The reaction arrow thickness (in pixel) scales linear with the flux (flux value / 10) with a maximal thickness of 20 pixel and a minimum value of 1.

Interaction of storage carbohydrates and other cyclic fluxes with central metabolism: A quantitative approach by non-stationary <sup>13</sup>C metabolic flux analysis.

### Supplementary Material #5: Flux maps & tables

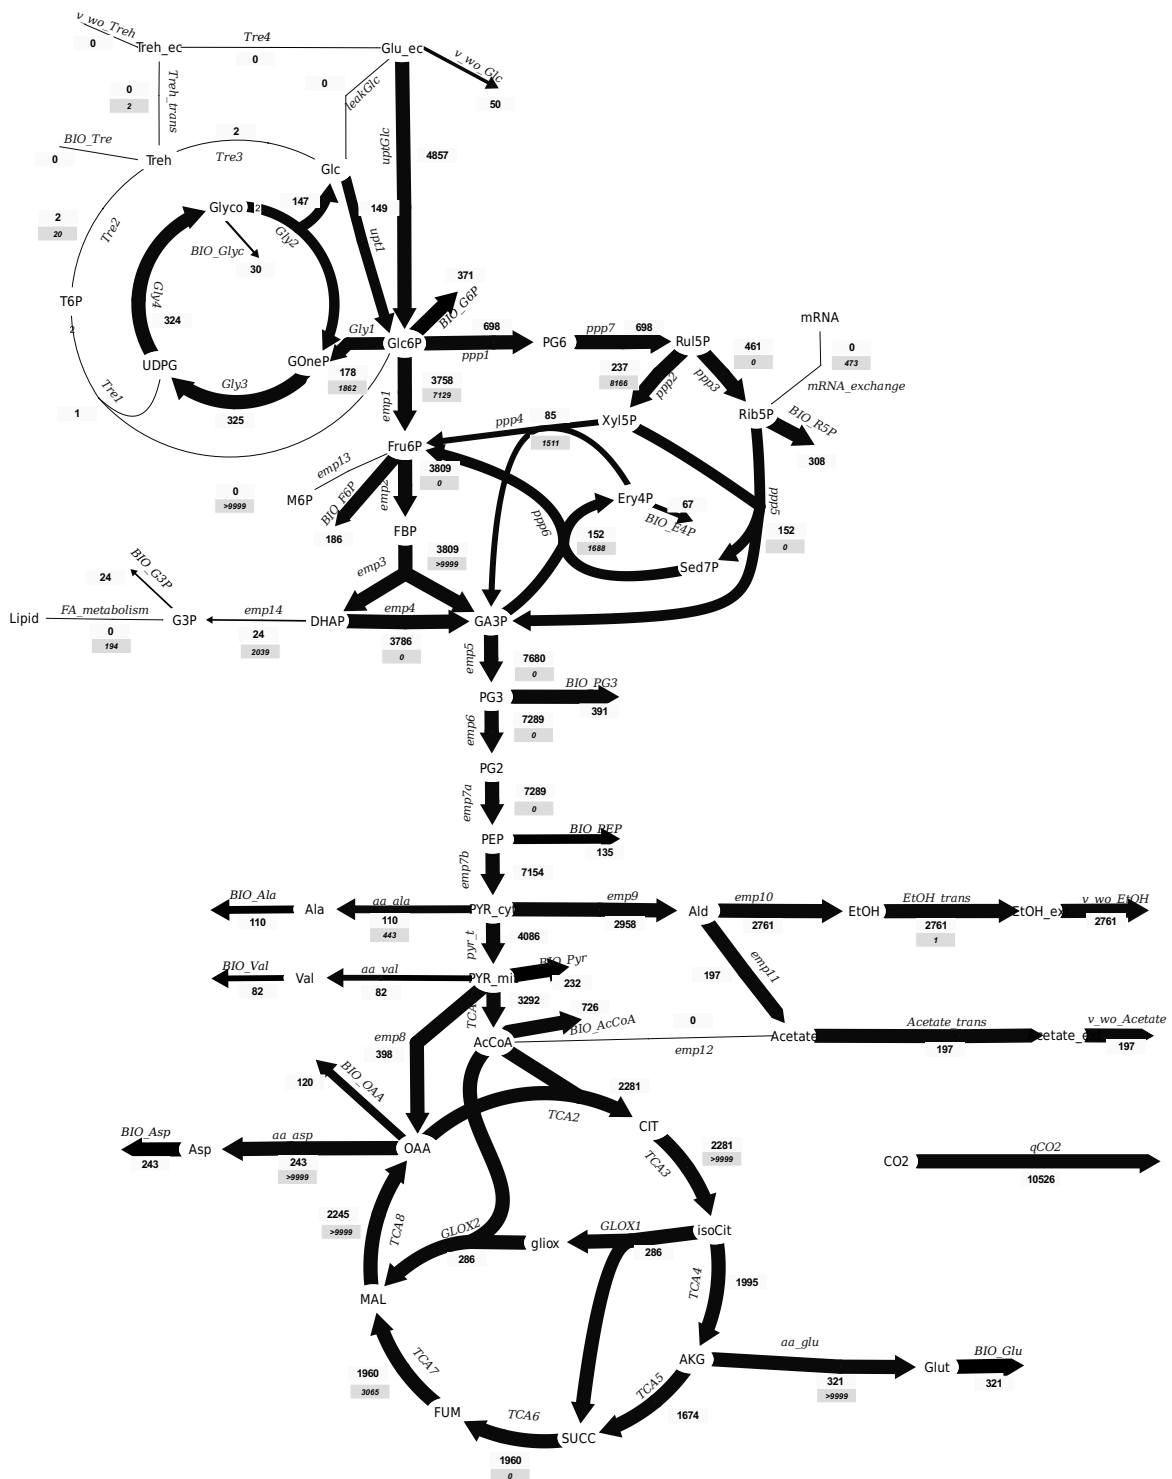

**Figure S5-4:** Flux distribution at the dilution rate  $D=0.307 \text{ h}^{-1}$ . Flux values are given in  $10^{-6} \text{ mol g}_{\text{DW}}^{-1} \text{ h}^{-1}$ , see Table S5-1 for standard deviations. The reaction arrow thickness (in pixel) scales linear with the flux (flux value / 10) with a maximal thickness of 20 pixel and a minimum value of 1.

Interaction of storage carbohydrates and other cyclic fluxes with central metabolism: A quantitative approach by non-stationary <sup>13</sup>C metabolic flux analysis.

### Supplementary Material #5: Flux maps & tables

**Table S5-1:** Flux values with standard deviation in 10<sup>-6</sup> mol/g/h. Standard deviation of 0 indicate that the flux was a given flux, resp. reached the given boundaries in the flux estimation.

| flux              | D=0.054 h <sup>-1</sup> |         | D=0.101 h <sup>-1</sup> |        | D=0.207 h <sup>-1</sup> |       | D=0.307 h <sup>-1</sup> |         |
|-------------------|-------------------------|---------|-------------------------|--------|-------------------------|-------|-------------------------|---------|
| aa_ala_bwd        | 246.9 +/-               | 6.3     | 573.2 +/-               | 21.9   | 1741.6 +/-              | 34.6  | 443.2 +/-               | 13.1    |
| aa_ala_fwd        | 271.8 +/-               | 6.3     | 621.9 +/-               | 21.9   | 1854.3 +/-              | 34.6  | 553.1 +/-               | 13.1    |
| aa_asp_bwd        | 2000 +/-                | 442.7   | 3000 +/-                | 0.0    | 6000 +/-                | 0.0   | 10000 +/-               | 0.0     |
| aa_asp_fwd        | 2045 +/-                | 442.7   | 3090 +/-                | 0.0    | 6201 +/-                | 0.0   | 10243 +/-               | 0.0     |
| aa_glu_bwd        | 1916 +/-                | 34.9    | 3000 +/-                | 94.2   | 5456 +/-                | 120.7 | 10000 +/-               | 0.0     |
| aa_glu_fwd        | 1959 +/-                | 34.9    | 3086 +/-                | 94.2   | 5645 +/-                | 120.7 | 10321 +/-               | 0.0     |
| aa_val_fwd        | 13.6 +/-                | 0.0     | 27.3 +/-                | 0.0    | 62.6 +/-                | 0.0   | 81.8 +/-                | 0.0     |
| Acetate_trans_fwd | 25.2 +/-                | 0.0     | 99.2 +/-                | 0.0    | 65.2 +/-                | 0.0   | 197.4 +/-               | 0.0     |
| BIO_AcCoA_fwd     | 141.3 +/-               | 0.0     | 217.7 +/-               | 0.0    | 488.5 +/-               | 0.0   | 725.6 +/-               | 0.0     |
| BIO_Ala_fwd       | 24.9 +/-                | 0.0     | 48.7 +/-                | 0.0    | 112.7 +/-               | 0.0   | 109.9 +/-               | 0.0     |
| BIO_Asp_fwd       | 45.4 +/-                | 0.0     | 90.1 +/-                | 0.0    | 200.8 +/-               | 0.0   | 242.9 +/-               | 0.0     |
| BIO_E4P_fwd       | 7.7 +/-                 | 0.0     | 15.1 +/-                | 0.0    | 33.3 +/-                | 0.0   | 67.4 +/-                | 0.0     |
| BIO_F6P_fwd       | 28.0 +/-                | 0.0     | 44.0 +/-                | 0.0    | 125.8 +/-               | 0.0   | 185.6 +/-               | 0.0     |
| BIO_G3P_fwd       | 5.0 +/-                 | 0.0     | 7.3 +/-                 | 0.0    | 16.3 +/-                | 0.0   | 23.8 +/-                | 0.0     |
| BIO_G6P_fwd       | 56.0 +/-                | 0.0     | 88.0 +/-                | 0.0    | 251.6 +/-               | 0.0   | 370.8 +/-               | 0.0     |
| BIO_Glu_fwd       | 43.5 +/-                | 0.0     | 85.8 +/-                | 0.0    | 189.3 +/-               | 0.0   | 321.4 +/-               | 0.0     |
| BIO_Glyc_fwd      | 23.7 +/-                | 0.0     | 59.8 +/-                | 0.0    | 25.0 +/-                | 0.0   | 29.9 +/-                | 0.0     |
| BIO_OAA_fwd       | 4.1 +/-                 | 0.0     | 11.0 +/-                | 0.0    | 22.6 +/-                | 0.0   | 119.6 +/-               | 0.0     |
| BIO_PEP_fwd       | 14.6 +/-                | 0.0     | 28.9 +/-                | 0.0    | 63.7 +/-                | 0.0   | 134.8 +/-               | 0.0     |
| BIO_PG3_fwd       | 38.7 +/-                | 0.0     | 78.7 +/-                | 0.0    | 172.3 +/-               | 0.0   | 391.2 +/-               | 0.0     |
| BIO_Pyr_fwd       | 34.7 +/-                | 0.0     | 68.6 +/-                | 0.0    | 151.5 +/-               | 0.0   | 231.9 +/-               | 0.0     |
| BIO_R5P_fwd       | 42.8 +/-                | 0.0     | 89.7 +/-                | 0.0    | 194.7 +/-               | 0.0   | 308.5 +/-               | 0.0     |
| BIO_Tre_fwd       | 15.8 +/-                | 0.0     | 32.7 +/-                | 0.0    | 0.7 +/-                 | 0.0   | 0.2 +/-                 | 0.0     |
| BIO_Val_fwd       | 13.6 +/-                | 0.0     | 27.3 +/-                | 0.0    | 62.6 +/-                | 0.0   | 81.8 +/-                | 0.0     |
| CO2out1_fwd       | 1682.8 +/-              | 0.0     | 2738.2 +/-              | 0.0    | 5975.4 +/-              | 0.0   | 10301 +/-               | 0.0     |
| deg_prod_in_fwd   | 128.3 +/-               | 2.0     | 849.2 +/-               | 10.6   | 442.7 +/-               | 4.5   | 9999 +/-                | 124.1   |
| deg_prod_out_fwd  | 128.3 +/-               | 2.0     | 849.2 +/-               | 10.6   | 442.7 +/-               | 4.5   | 9999 +/-                | 124.1   |
| emp1_bwd          | 2000 +/-                | 54.7    | 20000.0 +/-             | 3071   | 4222 +/-                | 87.1  | 7129 +/-                | 209.6   |
| emp1_fwd          | 2426 +/-                | 54.8    | 20921.1 +/-             | 3071   | 5963 +/-                | 87.1  | 10887 +/-               | 207.3   |
| emp10_fwd         | 0.0 +/-                 | 0.0     | 0.0 +/-                 | 0.0    | 0.0 +/-                 | 0.0   | 2761 +/-                | 0.0     |
| emp11_fwd         | 25.2 +/-                | 0.0     | 99.2 +/-                | 109.8  | 65.2 +/-                | 0.0   | 197.4 +/-               | 0.0     |
| emp12_fwd         | 0.0 +/-                 | 0.0     | 0.0 +/-                 | 109.8  | 0.0 +/-                 | 0.0   | 0.0 +/-                 | 0.0     |
| emp13_bwd         | 20000 +/-               | 39280   | 377.5 +/-               | 12.8   | 10000 +/-               | 0.0   | 20000 +/-               | 0.0     |
| emp13_fwd         | 20000 +/-               | 39280   | 377.5 +/-               | 12.8   | 10000 +/-               | 0.0   | 20000 +/-               | 0.0     |
| emp14_bwd         | 78.8 +/-                | 77.3    | 4993 +/-                | 1051   | 0.0 +/-                 | 0.0   | 2039 +/-                | 64068   |
| emp14_fwd         | 83.8 +/-                | 77.3    | 5000 +/-                | 1051   | 16.3 +/-                | 0.0   | 2063 +/-                | 64068   |
| emp2_bwd          | 0.0 +/-                 | 4.5     | 19996 +/-               | 213031 | 0.0 +/-                 | 0.0   | 0.0 +/-                 | 115.7   |
| emp2_fwd          | 445.7 +/-               | 4.9     | 20840 +/-               | 213031 | 1719 +/-                | 1.4   | 3809 +/-                | 119.0   |
| emp3_bwd          | 20000 +/-               | 1163846 | 290.0 +/-               | 169.9  | 0.0 +/-                 | 0.0   | 50000 +/-               | 1648709 |
| emp3_fwd          | 20446 +/-               | 1163846 | 1133.9 +/-              | 169.9  | 1719 +/-                | 1.4   | 53809 +/-               | 1648709 |
| emp4_bwd          | 1173 +/-                | 126.2   | 10000 +/-               | 6482   | 20000 +/-               | 0.0   | 0.0 +/-                 | 3704    |
| emp4_fwd          | 1613 +/-                | 126.2   | 10837 +/-               | 6482   | 21703 +/-               | 1.4   | 3786 +/-                | 3703    |
| emp5_bwd          | 0.0 +/-                 | 16.3    | 0.0 +/-                 | 68.7   | 0.0 +/-                 | 0.0   | 0.0 +/-                 | 1480    |
| emp5_fwd          | 907 +/-                 | 16.2    | 1656 +/-                | 68.7   | 3457 +/-                | 1.4   | 7680 +/-                | 1480    |
| emp6_bwd          | 20000 +/-               | 43251   | 20000 +/-               | 32681  | 0.0 +/-                 | 0.0   | 0.0 +/-                 | 14882   |
| emp6_fwd          | 20868 +/-               | 43251   | 21578 +/-               | 32681  | 3284 +/-                | 1.4   | 7289 +/-                | 14883   |
| emp7a_bwd         | 633 +/-                 | 137.7   | 20000 +/-               | 37325  | 0.0 +/-                 | 0.0   | 0.0 +/-                 | 4478    |
| emp7a_fwd         | 1501 +/-                | 137.7   | 21578 +/-               | 37325  | 3284 +/-                | 1.4   | 7289 +/-                | 4479    |
| emp7b_fwd         | 853.2 +/-               | 0.8     | 1549 +/-                | 0.1    | 3221 +/-                | 1.4   | 7154 +/-                | 7.3     |
| emp8_fwd          | 92.9 +/-                | 0.7     | 186.9 +/-               | 2.2    | 412.7 +/-               | 0.0   | 398.2 +/-               | 5.6     |
| emp9_fwd          | 25.2 +/-                | 0.0     | 99.2 +/-                | 109.8  | 65.2 +/-                | 0.0   | 2958 +/-                | 0.0     |
| EtOH_trans_bwd    | 0.1 +/-                 | 0.0     | 0.1 +/-                 | 0.0    | 0.1 +/-                 | 0.0   | 1.0 +/-                 | 0.0     |
| EtOH_trans_fwd    | 0.1 +/-                 | 0.0     | 0.1 +/-                 | 0.0    | 0.1 +/-                 | 0.0   | 2762 +/-                | 0.0     |
| FA_metabolism_bwd | 346.9 +/-               | 1435.2  | 1000 +/-                | 0.0    | 6.0 +/-                 | 4.8   | 194.4 +/-               | 48.4    |
| FA_metabolism_fwd | 346.9 +/-               | 1435.2  | 1000 +/-                | 0.0    | 6.0 +/-                 | 4.8   | 194.4 +/-               | 48.4    |
| GLOX1_fwd         | 0.0 +/-                 | 0.7     | 0.0 +/-                 | 2.2    | 0.0 +/-                 | 0.0   | 285.7 +/-               | 5.6     |

**Supplementary Material #5: Flux maps & tables**

**Table S5-1 (continued)**

| flux              | D=0.054 h <sup>-1</sup> |         | D=0.101 h <sup>-1</sup> |        | D=0.207 h <sup>-1</sup> |        | D=0.307 h <sup>-1</sup> |       |
|-------------------|-------------------------|---------|-------------------------|--------|-------------------------|--------|-------------------------|-------|
| GLOX2_fwd         | 0.0 +/-                 | 0.7     | 0.0 +/-                 | 2.2    | 0.0 +/-                 | 0.0    | 285.7 +/-               | 5.6   |
| Gly1_bwd          | 86.3 +/-                | 3.1     | 311.7 +/-               | 14.3   | 1696 +/-                | 46.3   | 1862 +/-                | 62.9  |
| Gly1_fwd          | 154.9 +/-               | 2.8     | 461.5 +/-               | 14.4   | 1826 +/-                | 46.3   | 2040 +/-                | 63.5  |
| Gly2_fwd          | 22.1 +/-                | 0.3     | 44.0 +/-                | 1.5    | 101.8 +/-               | 0.5    | 147.1 +/-               | 2.3   |
| Gly3_fwd          | 90.7 +/-                | 0.6     | 193.8 +/-               | 1.6    | 231.9 +/-               | 1.1    | 325.2 +/-               | 4.6   |
| Gly4_fwd          | 67.9 +/-                | 0.7     | 147.8 +/-               | 2.9    | 228.6 +/-               | 1.1    | 324.0 +/-               | 4.6   |
| leakGlc_fwd       | 0.0 +/-                 | 0.0     | 0.0 +/-                 | 0.0    | 0.0 +/-                 | 0.0    | 0.0 +/-                 | 0.0   |
| mRNA_exchange_bwd | 74.4 +/-                | 1.3     | 237.9 +/-               | 167.7  | 109.1 +/-               | 1.1    | 472.8 +/-               | 8.0   |
| mRNA_exchange_fwd | 74.4 +/-                | 1.3     | 237.9 +/-               | 167.7  | 109.1 +/-               | 1.1    | 472.8 +/-               | 8.0   |
| ppp1_fwd          | 118.5 +/-               | 2.3     | 47.5 +/-                | 0.4    | 366.4 +/-               | 4.3    | 697.9 +/-               | 21.7  |
| ppp1_bwd          | 2000 +/-                | 1959    | 90.2 +/-                | 5.8    | 4783 +/-                | 3608   | 8166 +/-                | 27316 |
| ppp2_fwd          | 2048 +/-                | 1960    | 57.0 +/-                | 5.8    | 4887 +/-                | 3607   | 8403 +/-                | 27319 |
| ppp3_bwd          | 6.7 +/-                 | 0.9     | 0.0 +/-                 | 0.3    | 0.0 +/-                 | 0.0    | 0.0 +/-                 | 5.1   |
| ppp3_fwd          | 77.3 +/-                | 1.3     | 80.7 +/-                | 0.4    | 263.0 +/-               | 1.4    | 460.7 +/-               | 8.6   |
| ppp4_bwd          | 378.2 +/-               | 6.4     | 440.6 +/-               | 8.0    | 1200 +/-                | 17.9   | 1511 +/-                | 68.9  |
| ppp4_fwd          | 398.3 +/-               | 6.3     | 416.5 +/-               | 8.0    | 1236 +/-                | 17.7   | 1596 +/-                | 67.1  |
| ppp5_bwd          | 0.0 +/-                 | 1.0     | 17.0 +/-                | 1.5    | 0.0 +/-                 | 0.0    | 0.0 +/-                 | 8.1   |
| ppp5_fwd          | 27.8 +/-                | 0.6     | 8.0 +/-                 | 1.5    | 68.4 +/-                | 1.4    | 152.3 +/-               | 4.9   |
| ppp6_bwd          | 199.2 +/-               | 3.4     | 277.9 +/-               | 6.6    | 801.8 +/-               | 10.2   | 1688 +/-                | 97.8  |
| ppp6_fwd          | 227.0 +/-               | 3.7     | 268.9 +/-               | 6.6    | 870.1 +/-               | 10.3   | 1841 +/-                | 100.6 |
| ppp7_fwd          | 118.5 +/-               | 2.3     | 47.5 +/-                | 0.4    | 366.4 +/-               | 4.3    | 697.9 +/-               | 21.7  |
| pyr_t_fwd         | 803.0 +/-               | 0.8     | 1400.9 +/-              | 109.8  | 3043 +/-                | 1.4    | 4086 +/-                | 7.3   |
| TCA1_fwd          | 648.1 +/-               | 1.0     | 1090.8 +/-              | 109.6  | 2353 +/-                | 1.4    | 3292.4 +/-              | 8.9   |
| TCA2_fwd          | 506.9 +/-               | 0.8     | 873.0 +/-               | 0.1    | 1864.9 +/-              | 1.4    | 2281.1 +/-              | 7.3   |
| TCA3_bwd          | 20000 +/-               | 1486152 | 10000 +/-               | 244049 | 10000 +/-               | 0.0    | 10000 +/-               | 0.0   |
| TCA3_fwd          | 20507 +/-               | 1486152 | 10873 +/-               | 244049 | 11865 +/-               | 1.4    | 12281 +/-               | 7.3   |
| TCA4_fwd          | 506.9 +/-               | 1.1     | 873.0 +/-               | 2.3    | 1864.9 +/-              | 1.4    | 1995 +/-                | 9.4   |
| TCA5_fwd          | 231.7 +/-               | 1.1     | 393.6 +/-               | 2.3    | 837.8 +/-               | 1.4    | 837.0 +/-               | 9.4   |
| TCA5B_fwd         | 231.7 +/-               | 0.0     | 393.6 +/-               | 0.0    | 837.8 +/-               | 0.0    | 837.0 +/-               | 0.0   |
| TCA6_bwd          | 211.1 +/-               | 18.0    | 1386.1 +/-              | 210.5  | 12178.5 +/-             | 4857.9 | 0.0 +/-                 | 31.2  |
| TCA6_fwd          | 442.8 +/-               | 18.1    | 1780 +/-                | 210.5  | 13016 +/-               | 4858   | 979.8 +/-               | 32.1  |
| TCA6B_bwd         | 211.1 +/-               | 0.0     | 1386 +/-                | 0.0    | 12179 +/-               | 0.0    | 0.0 +/-                 | 0.0   |
| TCA6B_fwd         | 442.8 +/-               | 0.0     | 1780 +/-                | 0.0    | 13016 +/-               | 0.0    | 979.8 +/-               | 0.0   |
| TCA7_bwd          | 20000 +/-               | 0.0     | 10000 +/-               | 3871   | 20000 +/-               | 0.0    | 3065 +/-                | 6113  |
| TCA7_fwd          | 20463 +/-               | 0.8     | 10787 +/-               | 3871   | 21676 +/-               | 1.4    | 5025 +/-                | 6114  |
| TCA8_bwd          | 20000 +/-               | 0.0     | 10000 +/-               | 3312   | 20000 +/-               | 0.0    | 20000 +/-               | 0.0   |
| TCA8_fwd          | 20463 +/-               | 1.0     | 10787 +/-               | 3313   | 21676 +/-               | 1.4    | 22245 +/-               | 8.9   |
| Tre1_fwd          | 22.8 +/-                | 0.8     | 46.0 +/-                | 1.4    | 3.3 +/-                 | 0.0    | 1.2 +/-                 | 0.1   |
| Tre2_bwd          | 70.4 +/-                | 2.5     | 44.0 +/-                | 1.5    | 0.2 +/-                 | 0.0    | 10.0 +/-                | 13.5  |
| Tre2_fwd          | 93.3 +/-                | 3.3     | 90.1 +/-                | 2.9    | 3.6 +/-                 | 0.0    | 11.2 +/-                | 13.4  |
| Tre2c_bwd         | 70.4 +/-                | 0.0     | 44.0 +/-                | 0.0    | 0.2 +/-                 | 0.0    | 10.0 +/-                | 0.0   |
| Tre2c_fwd         | 93.3 +/-                | 0.8     | 90.1 +/-                | 1.4    | 3.6 +/-                 | 0.0    | 11.2 +/-                | 0.1   |
| Tre3_fwd          | 0.0 +/-                 | 0.9     | 59.0 +/-                | 3.4    | 0.0 +/-                 | 0.0    | 2.1 +/-                 | 0.3   |
| Tre4_fwd          | 29.8 +/-                | 1.3     | 0.0 +/-                 | 1.9    | 5.9 +/-                 | 0.0    | 0.0 +/-                 | 0.2   |
| Treh_trans_bwd    | 100.0 +/-               | 2324    | 0.0 +/-                 | 25.8   | 100.0 +/-               | 0.0    | 1.6 +/-                 | 0.7   |
| Treh_trans_fwd    | 129.9 +/-               | 2325    | 0.3 +/-                 | 25.8   | 105.9 +/-               | 0.0    | 1.7 +/-                 | 0.6   |
| upt1_fwd          | 22.1 +/-                | 0.7     | 103.0 +/-               | 2.4    | 101.8 +/-               | 0.5    | 149.1 +/-               | 2.3   |
| uptGlc_fwd        | 669.7 +/-               | 1.3     | 1149 +/-                | 1.9    | 2391 +/-                | 0.0    | 4857 +/-                | 0.2   |
| v_wo_Acetate_fwd  | 25.2 +/-                | 0.0     | 99.2 +/-                | 0.0    | 65.2 +/-                | 0.0    | 197.4 +/-               | 0.0   |
| v_wo_EtOH_fwd     | 0.0 +/-                 | 0.0     | 0.0 +/-                 | 0.0    | 0.0 +/-                 | 0.0    | 2761 +/-                | 0.0   |
| v_wo_Glc_fwd      | 1.1 +/-                 | 0.0     | 5.1 +/-                 | 0.0    | 10.7 +/-                | 0.0    | 49.7 +/-                | 0.0   |
| v_wo_Treh_fwd     | 0.1 +/-                 | 0.0     | 0.3 +/-                 | 0.0    | 0.0 +/-                 | 0.0    | 0.1 +/-                 | 0.0   |
| vFeedB_fwd        | 640.9 +/-               | 0.0     | 1154 +/-                | 0.0    | 2396 +/-                | 0.0    | 4906 +/-                | 0.0   |
